# Supplementary material
Source: PubMed Central journal article supplement (PMC6411449)
Supplement: NIHMS1522263-supplement-1.pdf [file NIHMS1522263-supplement-1.pdf]

**UVB drives different stages of epigenome alterations during progression of skin cancer**

Yuqing Yang, Renyi Wu, Davit Sargsyan, Ran Yin, Hsiao-Chen Kuo, Lujing Wang, David Cheng, Chao Wang, Shanyi Li, Rasika Hudlikar, Yaoping Lu, and Ah-Ng Kong \*

\*Ernest Mario School of Pharmacy, Room 228, Rutgers University

160 Frelinghuysen Road, Piscataway, NJ 08854

E-mail: kongt@pharmacy.rutgers.edu

|                 |    |
|-----------------|----|
| Table S1 .....  | 2  |
| Table S2 .....  | 3  |
| Table S3 .....  | 6  |
| Table S4 .....  | 8  |
| Table S5 .....  | 9  |
| Table S6 .....  | 15 |
| Figure S1 ..... | 20 |
| Figure S2.....  | 21 |
| Figure S3.....  | 22 |

**Table S1.** Primers used in qPCR and pyrosequencing

| <b>qPCR primers (5' - 3')</b>           |                                      |
|-----------------------------------------|--------------------------------------|
| <b>E2f2</b>                             |                                      |
| Forward                                 | ACCTGACCGAAGATAATGCC                 |
| Reverse                                 | ACTGTCTGCTCCTTGAAGTTG                |
| <b>Il4ra</b>                            |                                      |
| Forward                                 | CTGTCTGATTTTGCTGTTGGTG               |
| Reverse                                 | GATGTAGTCAGAGAAGCAGGTG               |
| <b>Mgst2</b>                            |                                      |
| Forward                                 | CGCCCGTCACAAGTATTTCTG                |
| Reverse                                 | AAAGTCCAGGTATTCGTTTCAGG              |
| <b>Vegfa</b>                            |                                      |
| Forward                                 | GGCAGCTTGAGTTAAACGAAC                |
| Reverse                                 | TGGTGACATGGTTAATCGGTC                |
| <b>Pyrosequencing primers (5' - 3')</b> |                                      |
| <b>E2f2</b>                             |                                      |
| Forward                                 | TTGGATTTGGAGGGTATTGG                 |
| Reverse                                 | biotin-TCCTACCTCCTACCACCCACCATAAATA  |
| Sequencing                              | TGGAGGGTATTGGGA                      |
| <b>Il4ra</b>                            |                                      |
| Forward                                 | GTGTGTTGGTTTTTTTTGTTGT               |
| Reverse                                 | biotin-ACTTAAAACCAACCCTACTTAACT      |
| Sequencing                              | TGTTGGTTTTTTTTGTTGTT                 |
| <b>Mgst2</b>                            |                                      |
| Forward                                 | AGGTTTTTAAGATAGATTTATTAAGATT         |
| Reverse                                 | biotin-CCCCAAAAAACCCTTCTCTATTTAACAAC |
| Sequencing                              | ATTTATTAAGATTTGTGTAGTTTAT            |
| <b>Vegfa</b>                            |                                      |
| Forward                                 | GGAATTGAAGTTAGGGTGTTAATGG            |
| Reverse                                 | biotin-AAAACAAAATACACCCCTAAATTCT     |
| Sequencing                              | GGGTGTTAATGGGGG                      |

**Table S2.** Top 56 regulated pathways with  $p < 0.01$  in comparison of UVB (epidermis) vs Control (epidermis)

| Ingenuity Canonical Pathways                              | $-\log(p\text{-value})$ | z-score | Molecules                                                                                                                                                                                                                                                       |
|-----------------------------------------------------------|-------------------------|---------|-----------------------------------------------------------------------------------------------------------------------------------------------------------------------------------------------------------------------------------------------------------------|
| Cyclins and Cell Cycle Regulation                         | 3.0                     | 3.4     | CCNH,CDK4,CCNB2,CCND1,CDK1,CCNB1,HDAC5,SKP2,CCNA2,PPP2CB,E2F6,CCNE1,E2F1,FBXL5,GSK3B,E2F2,CDK2,E2F8                                                                                                                                                             |
| Estrogen-mediated S-phase Entry                           | 5.6                     | 2.3     | CCNA2,E2F6,CCNE1,E2F1,CDK4,RBL1,CCND1,CDK1,CDK2,E2F2,E2F8,SKP2                                                                                                                                                                                                  |
| Tumoricidal Function of Hepatic Natural Killer Cells      | 2.1                     | 2.2     | M6PR,CASP6,ICAM1,CASP3,CYCS,CASP7,DFFA                                                                                                                                                                                                                          |
| Mitotic Roles of Polo-Like Kinase                         | 2.3                     | 2.1     | ANAPC2,KIF23,CDC20,PTTG1,PRC1,CDC7,CCNB2,ANAPC10,CDK1,CCNB1,CD25B,PPP2CB,PLK4,CDC26                                                                                                                                                                             |
| Actin Nucleation by ARP-WASP Complex                      | 3.5                     | 1.8     | ITGB1,RAP2A,PPP1R12C,ARPC1B,GRB2,GNA12,RALB,RAC1,RHOV,RRAS2,RHOQ,PPP1R12A,RHOV,FNBP1,VASP,ARPC4                                                                                                                                                                 |
| NRF2-mediated Oxidative Stress Response                   | 4.8                     | 1.6     | MAP2K6,RAP2A,PIK3CA,GSTA5,HSPB8,DNAJA4,DNAJC10,DNAJB2,DNAJC15,PIK3R4,DNAJA1,SOD3,CUL3,ABCC1,PMF1/PMF1/BGLAP,GCLM,TXN,GSK3B,NFE2L2,MAP2K1,CBR1,DNAJC9,GRB2,GSTM3,FGFR1,NQO1,RALB,DNAJC1,JUNB,TXNRD1,GSTO1,RRAS2,MGST2,PRKCD,IRS1,PIK3CB,PIK3CD,ENC1,DNAJB5,GSTP1 |
| Ceramide Signaling                                        | 4.0                     | 1.5     | RAP2A,PIK3CA,S1PR5,BAD,CNKSR1,GRB2,FGFR1,SPHK2,RALB,CERK,PIK3R4,BCL2,S1PR4,S1PR3,PPP2CB,RRAS2,IRS1,SPHK1,PIK3CD,CYCS,PIK3CB,MAP2K1,NSMAF                                                                                                                        |
| Cytotoxic T Lymphocyte-mediated Apoptosis of Target Cells | 2.5                     | 1.0     | CD247,CASP6,CD3G,CASP3,CD3E,CYCS,CASP7,DFFA,BCL2                                                                                                                                                                                                                |
| Role of p14/p19ARF in Tumor Suppression                   | 2.1                     | 1.0     | PIK3CA,GRB2,NPM3,IRS1,FGFR1,E2F1,RAC1,PIK3CB,PIK3CD,PIK3R4                                                                                                                                                                                                      |
| Apoptosis Signaling                                       | 2.9                     | 0.9     | CAPN5,RAP2A,CASP3,BAD,RALB,CDK1,DFFA,BAK1,BCL2,ACIN1,BCL2L1,CASP6,CAPNS1,RRAS2,PLCG2,CAPN2,CAPN9,CYCS,MAP2K1,CASP7                                                                                                                                              |
| Cell Cycle Regulation by BTG Family Proteins              | 2.6                     | 0.7     | PPP2CB,E2F6,CCNE1,E2F1,CDK4,CCND1,CDK2,E2F2,E2F8,PRMT1                                                                                                                                                                                                          |
| p53 Signaling                                             | 4.5                     | 0.7     | PIK3CA,SNAI2,JMY,CDK4,HIF1A,PIK3R4,CCND1,BCL2,CCNG1,CASP6,THBS1,PPP1R13B,GSK3B,TOPBP1,GRB2,FGFR1,BIRC5,TP53BP2,BCL2L1,PCNA,IRS1,E2F1,PIK3CD,PIK3CB,PML,CDK2                                                                                                     |
| PTEN Signaling                                            | 5.8                     | 0.5     | FOXO4,RAP2A,CSNK2A1,PIK3CA,TGFBR1,YWHAH,BAD,CCND1,BCL2,TGFBR2,INPP5B,IGF1R,GSK3B,MAP2K1,ITGB1,CASP3,GRB2,FGFR1,RALB,RAC1,TNFRSF11A,INPP5D,SYNJ2,BCL2L1,MAGI1,GHR,RRAS2,FOXO1,PIK3CD,PIK3CB,INSR                                                                 |
| GM-CSF Signaling                                          | 2.3                     | 0.5     | RAP2A,PIK3CA,GRB2,FGFR1,RALB,JAK2,PIK3R4,CCND1,BCL2L1,CSF2RB,RRAS2,IRS1,PIK3CB,PIK3CD,STAT1,MAP2K1                                                                                                                                                              |
| STAT3 Pathway                                             | 4.2                     | 0.4     | RAP2A,MAP3K9,IL4R,TGFBR1,FGFR1,RALB,RAC1,IL22RA1,JAK2,TNFRSF11A,MAPK12,BCL2,TGFBR2,VEGFA,CSF2RB,GHR,RRAS2,IGF1R,TGFA,IFNLR1,IL1B,INSR,MAP2K1,SOCS5                                                                                                              |
| Purine Nucleotides Degradation II (Aerobic)               | 2.8                     | 0.4     | GDA,NT5E,XDH,IMPDH1,ADA,NT5C2,ACPP                                                                                                                                                                                                                              |
| $\alpha$ -Adrenergic Signaling                            | 2.7                     | 0.3     | GNG4,RAP2A,Calm1 (includes others),ADCY3,RALB,GNB5,ADCY6,PHKA2,GNG10,RRAS2,PRKAR2B,PLCG2,PRKCD,ITPR3,PRKAG2,GNG5,MAP2K1,GNG12,PRKAR1A                                                                                                                           |
| Regulation of Cellular Mechanics by Calpain Protease      | 4.5                     | 0.3     | CAPN5,ITGB1,RAP2A,GRB2,RALB,CDK4,TLN1,CCND1,CDK1,CCNA2,CCNE1,CAPNS1,RRAS2,TLN2,CAPN2,CAPN9,CDK2,ACTN1                                                                                                                                                           |
| Melanoma Signaling                                        | 3.6                     | 0.3     | RAP2A,PIK3CA,BAD,GRB2,MITF,FGFR1,RALB,CDK4,PIK3R4,CCND1,RRAS2,IRS1,E2F1,PIK3CB,PIK3CD,MAP2K1                                                                                                                                                                    |
| Prolactin Signaling                                       | 2.9                     | 0.2     | RAP2A,PIK3CA,GRB2,FGFR1,RALB,JAK2,PIK3R4,NR3C1,IRF1,RRAS2,IRS1,PLCG2,PRKCD,NMI,PIK3CD,PIK3CB,STAT1,SOCS5,MAP2K1                                                                                                                                                 |
| Renin-Angiotensin Signaling                               | 3.4                     | 0.2     | RAP2A,PIK3CA,JAK2,PIK3R4,SHF,STAT1,MAP2K1,PAK6,GRB2,FGFR1,ADCY3,RALB,RAC1,ADCY6,MAPK12,PRKAR2B,RRAS2,PAK3,IRS1,PLCG2,PRKCD,ITPR3,PRKAG2,PIK3CD,PIK3CB,PRKAR1A                                                                                                   |
| Rac Signaling                                             | 4.6                     | 0.2     | RAP2A,ABI2,PIK3CA,ARPC1B,PIK3R4,CDK5R1,ARFIP2,MAP2K1,PI4KA,IQGAP3,ITGB1,PAK6,CFL1,GRB2,FGFR1,RALB,RAC1,MCF2L,RRAS2,PAK3,PIP5K1C,IRS1,CD44,PIK3CD,PIK3CB,SH3RF1,PARD3,ARPC4                                                                                      |
| Glioblastoma Multiforme Signaling                         | 4.6                     | 0.2     | RAP2A,PIK3CA,CDK4,PIK3R4,CCND1,E2F6,MTOR,WNT7B,TSC2,RHOV,IGF1R,GSK3B,MAP2K1,E2F8,E2F2,GRB2,FGFR1,RALB,RAC1,RHOV,CCNE1,RHOQ,RRAS2,WNT10A,FOXO1,PRKCD,PLCG2,IRS1,ITPR3,E2F1,FZD6,PIK3CD,PIK3CB,CDK2,FNBP1                                                         |

| <b>Ingenuity Canonical Pathways</b>                   | <b>-log(p-value)</b> | <b>z-score</b> | <b>Molecules</b>                                                                                                                                                                                    |
|-------------------------------------------------------|----------------------|----------------|-----------------------------------------------------------------------------------------------------------------------------------------------------------------------------------------------------|
| PDGF Signaling                                        | 3.8                  | 0.0            | RAP2A,CSNK2A1,PIK3CA,GRB2,FGFR1,SPHK2,RALB,JAK2,PIK3R4,INPP5D,SYNJ2,RRAS2,ABL2,INPP5B,IRS1,PLCG2,SPHK1,PIK3CD,PIK3CB,EIF2AK2,STAT1,MAP2K1                                                           |
| IL-3 Signaling                                        | 3.4                  | 0.0            | RAP2A,GAB2,PIK3CA,BAD,GRB2,FGFR1,RALB,RAC1,JAK2,PIK3R4,INPP5D,CSF2RB,RRAS2,FOXO1,IRS1,PRKCD,PIK3CB,PIK3CD,STAT1,MAP2K1                                                                              |
| Renal Cell Carcinoma Signaling                        | 3.0                  | 0.0            | RAP2A,PIK3CA,PAK6,SLC2A1,GRB2,FGFR1,RALB,RAC1,HIF1A,PIK3R4,VEGFA,RRAS2,PAK3,IRS1,TGFA,PIK3CD,PIK3CB,MAP2K1,VHL                                                                                      |
| CNTF Signaling                                        | 2.9                  | 0.0            | RAP2A,PIK3CA,GRB2,FGFR1,RALB,JAK2,PIK3R4,LIFR,MTOR,RPS6KA6,RRAS2,IRS1,PIK3CB,PIK3CD,STAT1,MAP2K1                                                                                                    |
| Thrombopoietin Signaling                              | 2.8                  | 0.0            | RAP2A,GAB2,PIK3CA,GRB2,FGFR1,RALB,JAK2,PIK3R4,RRAS2,IRS1,PLCG2,PRKCD,PIK3CB,PIK3CD,STAT1,MAP2K1                                                                                                     |
| ErbB2-ErbB3 Signaling                                 | 2.6                  | 0.0            | RAP2A,PIK3CA,BAD,GRB2,FGFR1,RALB,PIK3R4,CCND1,RRAS2,FOXO1,IRS1,PIK3CB,PIK3CD,ERBB2,GSK3B,MAP2K1                                                                                                     |
| Mitochondrial L-carnitine Shuttle Pathway             | 2.3                  | 0.0            | ACSL3,SLC27A6,CPT2,SLC27A3,CPT1C,ACSL1                                                                                                                                                              |
| Insulin Receptor Signaling                            | 3.9                  | -0.2           | FOXO4,RAP2A,PIK3CA,BAD,JAK2,PIK3R4,EIF4EBP1,MTOR,Ppp1cc,PPP1R12A,PPP1R10,INPP5B,TSC2,GSK3B,MAP2K1,GRB2,FGFR1,RALB,INPP5D,SYNJ2,RRAS2,RHOQ,PRKAR2B,FOXO1,IRS1,PRKAG2,PIK3CD,PIK3CB,INSR,PRKAR1A      |
| CCR3 Signaling in Eosinophils                         | 4.1                  | -0.2           | RAP2A,PIK3CA,MPRIP,Calm1 (includes others),GNB5,PIK3R4,PLA2G4E,PPP1R12A,GNG5,MAP2K1,GNG12,GNG4,PAK6,CFL1,GRB2,FGFR1,RALB,RAC1,PLA2G3,MAPK12,GNG10,RRAS2,PAK3,PLA2G2D,IRS1,PRKCD,ITPR3,PIK3CD,PIK3CB |
| Ovarian Cancer Signaling                              | 4.1                  | -0.2           | RAP2A,PIK3CA,CDK4,PIK3R4,CCND1,BCL2,RAD51,VEGFA,MTOR,ARRB1,END1,WNT7B,GSK3B,MAP2K1,GRB2,FGFR1,RALB,PTGS1,PRKAR2B,RRAS2,WNT10A,IRS1,E2F1,CD44,PRKAG2,FZD6,BRCA2,PIK3CD,PIK3CB,Tcf7,PRKAR1A           |
| UVA-Induced MAPK Signaling                            | 3.2                  | -0.3           | RAP2A,PARP6,PIK3CA,CASP3,GRB2,PARP10,FGFR1,RALB,PARP8,PARP12,PIK3R4,MAPK12,PARP9,BCL2L1,MTOR,RPS6KA6,RRAS2,PLCG2,IRS1,PIK3CD,CYCS,PIK3CB,STAT1                                                      |
| Endometrial Cancer Signaling                          | 2.4                  | -0.3           | RAP2A,PIK3CA,BAD,GRB2,FGFR1,RALB,PIK3R4,CCND1,RRAS2,IRS1,PIK3CB,PIK3CD,ERBB2,GSK3B,MAP2K1                                                                                                           |
| Guanosine Nucleotides Degradation III                 | 2.4                  | -0.4           | GDA,NT5E,XDH,NT5C2,ACPP                                                                                                                                                                             |
| Urate Biosynthesis/Inosine 5'-phosphate Degradation   | 2.2                  | -0.4           | NT5E,XDH,IMPDH1,NT5C2,ACPP                                                                                                                                                                          |
| Non-Small Cell Lung Cancer Signaling                  | 3.8                  | -0.5           | RAP2A,PIK3CA,BAD,GRB2,FGFR1,RALB,CDK4,PIK3R4,CCND1,STK4,RRAS2,IRS1,ITPR3,E2F1,TGFA,PIK3CD,PIK3CB,ERBB2,RASSF5,MAP2K1                                                                                |
| Glioma Invasiveness Signaling                         | 2.5                  | -0.5           | RAP2A,PIK3CA,GRB2,FGFR1,HMMR,RALB,PIK3R4,RHOV,RRAS2,RHOQ,IRS1,RHO,CD44,PIK3CB,PIK3CD,FNBP1                                                                                                          |
| Role of BRCA1 in DNA Damage Response                  | 4.5                  | -0.6           | FANCM,RBL2,ARID1A,TOPBP1,RBBP8,ARID2,RBL1,RFC5,SMARCA4,RAD51,E2F6,RFC4,E2F1,RFC2,BRCA2,BLM,STAT1,E2F2,E2F8,PHF10,RFC3                                                                               |
| Paxillin Signaling                                    | 4.0                  | -0.7           | RAP2A,PIK3CA,ITGA2B,TLN1,ITGB8,PIK3R4,PTPN12,ARFIP2,ACTN1,ITGB1,PARVA,PAK6,GRB2,FGFR1,RALB,RAC1,ITGA6,MAPK12,TLN2,RRAS2,PAK3,IRS1,PIK3CD,PIK3CB,ITGB6,ITGA7                                         |
| Role of CHK Proteins in Cell Cycle Checkpoint Control | 2.4                  | -0.7           | RFC5,CDK1,E2F6,PPP2CB,PCNA,RFC4,E2F1,RFC2,TLK2,CDK2,E2F8,E2F2,RFC3                                                                                                                                  |
| IL-7 Signaling Pathway                                | 2.8                  | -0.8           | FOXO4,PIK3CA,SLC2A1,BAD,GRB2,FGFR1,PIK3R4,MAPK12,BCL6,CCND1,BAK1,BCL2,FOXO1,IRS1,PIK3CD,PIK3CB,GSK3B,STAT1,CDK2                                                                                     |
| ErbB Signaling                                        | 3.7                  | -0.9           | MAP2K6,RAP2A,PIK3CA,PAK6,BTC,GRB2,FGFR1,RALB,PIK3R4,MAPK12,MTOR,RRAS2,FOXO1,PAK3,PRKCD,PLCG2,IRS1,TGFA,PIK3CD,PIK3CB,ERBB2,GSK3B,MAP2K1                                                             |
| Pyridoxal 5'-phosphate Salvage Pathway                | 3.3                  | -1.0           | MAP2K6,MAP3K9,DMPK,CDK4,GRK5,CDK1,PNPO,ARAF,PAK3,PRKCD,PRKAA1,EIF2AK2,NEK2,HIPK1,MAP2K1,CDK2                                                                                                        |
| Fatty Acid $\beta$ -oxidation I                       | 2.5                  | -1.0           | ACSL3,ECI2,SLC27A6,SLC27A3,IVD,ACADM,HSD17B4,HADH,ACSL1                                                                                                                                             |
| Pancreatic Adenocarcinoma Signaling                   | 7.3                  | -1.2           | PIK3CA,TGFBF1,BAD,CDK4,JAK2,PIK3R4,CCND1,BCL2,RAD51,TGFBF2,VEGFA,E2F6,GPLD1,ERBB2,STAT1,MAP2K1,E2F8,E2F2,GRB2,FGFR1,RAC1,MAPK12,RALBP1,BIRC5,BCL2L1,CCNE1,IRS1,E2F1,TGFA,BRCA2,PIK3CD,PIK3CB,CDK2   |
| Small Cell Lung Cancer Signaling                      | 2.8                  | -1.3           | PIK3CA,GRB2,FGFR1,CDK4,PIK3R4,CCND1,BCL2,SKP2,BCL2L1,CCNE1,IRS1,E2F1,CKS1B,CYCS,PIK3CB,PIK3CD,TRAF5,CDK2                                                                                            |
| Glioma Signaling                                      | 4.3                  | -1.4           | RAP2A,RBL2,PIK3CA,Calm1 (includes others),CAMK1D,GRB2,FGFR1,RALB,CDK4,PIK3R4,RBL1,CCND1,IDH1,E2F6,                                                                                                  |

| <b>Ingenuity Canonical Pathways</b>               | <b>-log(p-value)</b> | <b>z-score</b> | <b>Molecules</b>                                                                                                                                          |
|---------------------------------------------------|----------------------|----------------|-----------------------------------------------------------------------------------------------------------------------------------------------------------|
|                                                   |                      |                | MTOR,RRAS2,PRKCD,PLCG2,IRS1,E2F1,IGF1R,TGFA,PIK3CB,PIK3CD,MAP2K1,E2F8,E2F2                                                                                |
| Amyloid Processing                                | 3.4                  | -1.4           | CAPN5,CSNK2A1,MAPK12,CDK5R1,APP,CAPNS1,PRKAR2B,MAPT,PRKAG2,CAPN2,CAPN9,GSK3B,BACE2,PRKAR1A                                                                |
| Sumoylation Pathway                               | 2.9                  | -1.5           | SUMO3,DNMT3A,RAN,SENP2,MAPK12,RFC5,NR3C1,RHOV,PCNA,RHOQ,RFC4,RCC1,CTBP2,RHO,RFC2,CBX4,PML,FNBP1,ISG20,RFC3                                                |
| FLT3 Signaling in Hematopoietic Progenitor Cells  | 2.7                  | -1.6           | RAP2A,GAB2,PIK3CA,BAD,GRB2,FGFR1,RALB,PIK3R4,MAPK12,INPP5D,EIF4EBP1,MTOR,RPS6KA6,RRAS2,IRS1,PIK3CB,PIK3CD,STAT1,MAP2K1                                    |
| Acute Myeloid Leukemia Signaling                  | 3.6                  | -1.8           | MAP2K6,RAP2A,PIK3CA,BAD,GRB2,FGFR1,RALB,PIK3R4,CCND1,CSF1R,EIF4EBP1,IDH1,CSF2RB,MTOR,RRAS2,ARAF,IRS1,PIK3CD,PIK3CB,PML,Tcf7,MAP2K1                        |
| Sphingosine-1-phosphate Signaling                 | 3.6                  | -1.8           | PIK3CA,CASP4,PIK3R4,CASP6,RHO,SPHK1,CASP1,S1PR5,CASP3,GRB2,GN A12,FGFR1,ADCY3,RAC1,ADCY6,S1PR3,S1PR4,RHOV,RHOQ,ACER3,IRS1,PLCG2,PIK3CD,PIK3CB,CASP7,FNBP1 |
| Cell Cycle: G1/S Checkpoint Regulation            | 3.1                  | -1.9           | RBL2,PAK1IP1,CDK4,RBL1,CCND1,HDAC5,SKP2,E2F6,CCNE1,FOXO1,E2F1,FBXL5,GSK3B,E2F2,CDK2,E2F8                                                                  |
| Cell Cycle: G2/M DNA Damage Checkpoint Regulation | 2.5                  | -2.7           | CDC25B,YWHAH,PTPMT1,CKS1B,TOP2A,CCNB2,FBXL5,AURKA,CDK1,CCNB1,SKP2,PPM1D                                                                                   |

**Table S3.** Top 50 regulated genes with adjusted p-value ( $q$ )  $< 0.01$  in comparison of UVB (tumor) vs Control (whole skin)

| Gene symbol   | log <sub>2</sub> FoldChange | Adjusted p-value | Gene description                                                                       |
|---------------|-----------------------------|------------------|----------------------------------------------------------------------------------------|
| 2300005B03Rik | -1.96                       | 0.00000044       | RIKEN cDNA 2300005B03                                                                  |
| Aadacl2       | 1.04                        | 0.00496187       | arylacetamide deacetylase like 2                                                       |
| Adh6a         | -4.13                       | 0.00649281       | alcohol dehydrogenase 6A (class V)                                                     |
| Adrb3         | -1.6                        | 0.00037685       | adrenergic receptor, beta 3                                                            |
| Arc           | 2.27                        | 0.00061165       | activity regulated cytoskeletal-associated protein                                     |
| Bace2         | 0.8                         | 0.00754084       | beta-site APP-cleaving enzyme 2                                                        |
| Ccl20         | -2.01                       | 0.00552719       | chemokine (C-C motif) ligand 20                                                        |
| Cd3g          | -2.16                       | 0.00061165       | CD3 antigen, gamma polypeptide                                                         |
| Cd7           | -2.78                       | 0.00038698       | CD7 antigen                                                                            |
| Cfap57        | -2.38                       | 0.00003786       | cilia and flagella associated protein 57                                               |
| Cldn23        | -1.93                       | 0.00020086       | claudin 23                                                                             |
| Col4a5        | -1.56                       | 0.00682342       | collagen, type IV, alpha 5                                                             |
| Csrnp1        | 1.12                        | 0.00087171       | cysteine-serine-rich nuclear protein 1                                                 |
| Ctnbp2        | -1.81                       | 0.00265291       | cortactin binding protein 2                                                            |
| Cyp2b10       | 0.68                        | 0.00565124       | cytochrome P450, family 2, subfamily b, polypeptide 10                                 |
| Degs2         | 1.58                        | 0.00682342       | delta(4)-desaturase, sphingolipid 2                                                    |
| Dsg1b         | 1                           | 0.00682342       | desmoglein 1 beta                                                                      |
| Fam46b        | 1.19                        | 0.00020073       | Family With Sequence Similarity 46 Member B                                            |
| Galnt6        | 1.14                        | 0.00106727       | polypeptide N-acetylgalactosaminyltransferase 6                                        |
| Grid2ip       | 1.86                        | 0.00722759       | glutamate receptor, ionotropic, delta 2 (Grid2) interacting protein 1                  |
| Hmcn1         | -2.41                       | 0.00682342       | hemicentin 1                                                                           |
| Il4ra         | 1.2                         | 0.00076271       | interleukin 4 receptor, alpha                                                          |
| Junb          | 1.55                        | 0.00037685       | jun B proto-oncogene                                                                   |
| Krt77         | -3.31                       | 0.00000001       | keratin 77                                                                             |
| Lgals12       | -1.76                       | 0.00000245       | lectin, galactose binding, soluble 12                                                  |
| Lypd5         | 1.37                        | 0.00100465       | Ly6/Plaur domain containing 5                                                          |
| Mapk8ip1      | -1.39                       | 0.00376888       | mitogen-activated protein kinase 8 interacting protein 1                               |
| Mpzl3         | 1.15                        | 0.00682342       | myelin protein zero-like 3                                                             |
| Mvk           | 0.77                        | 0.00625237       | mevalonate kinase                                                                      |
| Myom3         | 1.08                        | 0.00376882       | myomesin family, member 3                                                              |
| Ocln          | -1.43                       | 0.00594436       | occludin                                                                               |
| Orm1          | -1.54                       | 0.00051209       | orosomuroid 1                                                                          |
| Per3          | -1.23                       | 0.0088757        | period circadian clock 3                                                               |
| Pkib          | -1.02                       | 0.00766542       | protein kinase inhibitor beta, cAMP dependent, testis specific                         |
| Ptges         | 0.86                        | 0.00061165       | prostaglandin E synthase                                                               |
| Rnf152        | 1.3                         | 0.00682342       | ring finger protein 152                                                                |
| Rnf19b        | 0.79                        | 0.00682342       | ring finger protein 19B                                                                |
| Sbno2         | 0.96                        | 0.00003896       | strawberry notch 2                                                                     |
| Scd3          | -2.59                       | 0.00061165       | stearoyl-coenzyme A desaturase 3                                                       |
| Scnn1g        | 1.49                        | 0.00582844       | sodium channel, nonvoltage-gated 1 gamma                                               |
| Sema3d        | -2.26                       | 0.00001696       | sema domain, immunoglobulin domain (Ig), short basic domain, secreted, (semaphorin) 3D |

| <b>Gene symbol</b> | <b>log<sub>2</sub>FoldChange</b> | <b>Adjusted p-value</b> | <b>Gene description</b>                                                         |
|--------------------|----------------------------------|-------------------------|---------------------------------------------------------------------------------|
| Skint5             | -3.23                            | 0.00000002              | selection and upkeep of intraepithelial T cells 5                               |
| Skint6             | -2.52                            | 0.00000012              | selection and upkeep of intraepithelial T cells 6                               |
| Skint9             | -1.16                            | 0.0007666               | selection and upkeep of intraepithelial T cells 9                               |
| Slc25a48           | 1.26                             | 0.00090115              | solute carrier family 25, member 48                                             |
| Slc7a11            | 1.33                             | 0.00625237              | solute carrier family 7 (cationic amino acid transporter, y+ system), member 11 |
| Smox               | 0.93                             | 0.00934888              | spermine oxidase                                                                |
| Sult2b1            | 0.88                             | 0.00300459              | sulfotransferase family, cytosolic, 2B, member 1                                |
| Tppp               | -1.89                            | 0.00568348              | tubulin polymerization promoting protein                                        |
| Trim25             | 0.72                             | 0.00683121              | tripartite motif-containing 25                                                  |

**Table S4.** Top 29 regulated pathways with  $p < 0.01$  in comparison of UVB (tumor) vs Control (whole skin)

| Ingenuity Canonical Pathways                                 | $-\log(p\text{-value})$ | z-score | Molecules                                                                                                                                                         |
|--------------------------------------------------------------|-------------------------|---------|-------------------------------------------------------------------------------------------------------------------------------------------------------------------|
| Pancreatic Adenocarcinoma Signaling                          | 5.03                    | 2.1     | RELA,PLD3,PIK3R1,HBEGF,STAT3,RALBP1,PLD1,BCL2,TGFBR2,VEGFA,CDKN1A,GPLD1,TGFA,E2F5,STAT1,RALGDS,E2F8,E2F2                                                          |
| LPS/IL-1 Mediated Inhibition of RXR Function                 | 4.11                    | 1.9     | PPARA,CYP3A7,TNFRSF1A,MYD88,GSTM3,GSTA5,IL36B,ABCN9,SULT2B1,IL33,GSTZ1,IL36G,SMOX,ALDH1A3,ALDH3A2,CAT,IL1B,SLC27A1,HS3ST1,CYP2B6,SLC27A3,ALDH16A1,ALDH3A1,ALDH6A1 |
| STAT3 Pathway                                                | 4.02                    | 1.5     | SOCS3,IL4R,IL13RA1,RALB,IL17RC,IL12RB2,IL22RA1,STAT3,IL20RB,BCL2,TGFBR2,VEGFA,GHR,CXCR2,CDKN1A,TGFA,IL1B                                                          |
| Phospholipases                                               | 3.97                    | 0.9     | PLCD1,PLBD1,PLA2G4E,PLD3,PLA2G2D,ABHD3,PLB1,GPLD1,PNPLA3,PLA2G4F,PLD1                                                                                             |
| NF- $\kappa$ B Signaling                                     | 3.94                    | 2.8     | RELA,MAP3K14,TRAF3,BMP4,TNFRSF1A,MYD88,PIK3R1,RALB,IL36B,IL33,TLR2,TGFBR2,IL36G,GHR,UBE2V1,TGFA,IL1B,EIF2AK2,LTBR,TRAF5,IRAK4                                     |
| Toll-like Receptor Signaling                                 | 3.84                    | 3.0     | PPARA,TLR2,IL33,MAP3K14,RELA,IL36G,TOLLIP,MYD88,IL1B,EIF2AK2,IRAK4,IL36B                                                                                          |
| Eicosanoid Signaling                                         | 3.66                    | 1.0     | PLBD1,PLA2G4E,PTGES,LTB4R,ALOX15B,PLA2G2D,LTB4R2,ABHD3,PLB1,PNPLA3,PLA2G4F                                                                                        |
| Osteoarthritis Pathway                                       | 3.63                    | 1.7     | RELA,TCF4,BGLAP,EPAS1,DDIT4,FZD3,PPARD,TNFRSF1A,DLX5,HIF1A,VEGFA,TLR2,TGFBR2,CASP6,ELF3,CXCR2,DDR2,IL1B,SOX9,CASP14,TCF7L2,FZD7                                   |
| TNFR1 Signaling                                              | 3.45                    | 0.3     | MAP4K2,MAP3K14,RELA,CASP6,PAK1,PAK6,PAK3,TNFRSF1A,BIRC3                                                                                                           |
| Interferon Signaling                                         | 3                       | 1.6     | RELA,IRF9,STAT2,IFI35,STAT1,BAK1,BCL2                                                                                                                             |
| Noradrenaline and Adrenaline Degradation                     | 2.93                    | -0.4    | ADH7,DHRS9,SMOX,ALDH1A3,Adh6a,ALDH3A2,ALDH3A1                                                                                                                     |
| Antioxidant Action of Vitamin C                              | 2.9                     | -1.2    | RELA,PLD3,SLC2A1,ABHD3,PLD1,PLBD1,PLCD1,PLA2G4E,PLA2G2D,PLB1,GPLD1,PNPLA3,PLA2G4F                                                                                 |
| Phospholipase C Signaling                                    | 2.78                    | 1.7     | CD247,GNG4,RELA,PLD3,CD3E,RALB,ADCY6,HDAC10,CD3D,PLD1,PLCD1,PLA2G4E,CD3G,RHOV,RHOG,PLA2G2D,HDAC11,GPLD1,GNB2,PLA2G4F,RHOF,RALGDS                                  |
| Activation of IRF by Cytosolic Pattern Recognition Receptors | 2.7                     | 1.7     | IFIH1,RELA,IRF7,TRAF3,MAVS,IRF9,STAT2,STAT1,ADAR                                                                                                                  |
| IL-8 Signaling                                               | 2.63                    | 2.2     | GNG4,RELA,ICAM1,PLD3,PIK3R1,RALB,HBEGF,PLD1,BCL2,VEGFA,RHOV,ITGAM,CCND2,RHOG,CXCR2,GPLD1,GNB2,RHOF,IRAK4                                                          |
| Renal Cell Carcinoma Signaling                               | 2.62                    | 0       | VEGFA,ETS1,PAK1,PAK6,SLC2A1,PAK3,PIK3R1,RALB,TGFA,EGLN3,HIF1A                                                                                                     |
| Cytotoxic T Lymphocyte-mediated Apoptosis of Target Cells    | 2.56                    | -0.8    | CD247,CD3G,CASP6,CD3E,CD3D,BCL2                                                                                                                                   |
| Colorectal Cancer Metastasis Signaling                       | 2.54                    | 1.6     | GNG4,RELA,TCF4,FZD3,TNFRSF1A,MMP14,PIK3R1,RALB,ADCY6,STAT3,VEGFA,TLR2,TGFBR2,RHOV,RHOG,GNB2,WNT4,STAT1,RHOF,RALGDS,TCF7L2,FZD7                                    |
| Retinoate Biosynthesis I                                     | 2.42                    | 1.6     | SDR9C7,ADH7,DHRS9,ALDH1A3,RDH16,AKR1B10                                                                                                                           |
| Ethanol Degradation II                                       | 2.42                    | -0.8    | ADH7,DHRS9,ALDH1A3,ALDH3A2,Adh6a,ALDH3A1                                                                                                                          |
| Endothelin-1 Signaling                                       | 2.39                    | 1.4     | PLD3,ABHD3,PIK3R1,RALB,MAPK6,ADCY6,PLD1,PLBD1,PLCD1,CASP6,PLA2G4E,PLA2G2D,EDN1,PLB1,GPLD1,PLA2G4F,PNPLA3,CASP14                                                   |
| Type I Diabetes Mellitus Signaling                           | 2.36                    | 0.6     | CD247,SOCS3,CD3G,MAP3K14,RELA,CD3E,MYD88,TNFRSF1A,IL1B,STAT1,CD3D,BCL2                                                                                            |
| 3-phosphoinositide Degradation                               | 2.27                    | 0.8     | SOCS3,EPHX2,PPP4R1,STYX,HACD2,PPP4C,PPM1K,DUSP14,ITPK1,DUSP5,PTPRJ,PDXP,PTPN1,SGPP2,MTM1                                                                          |
| D-myo-inositol (1,4,5,6)-Tetrakisphosphate Biosynthesis      | 2.24                    | 1.1     | SOCS3,EPHX2,PPP4R1,STYX,HACD2,PPM1K,PPP4C,DUSP14,ITPK1,DUSP5,PTPRJ,PDXP,PTPN1,SGPP2                                                                               |
| D-myo-inositol (3,4,5,6)-tetrakisphosphate Biosynthesis      | 2.24                    | 1.1     | SOCS3,EPHX2,PPP4R1,STYX,HACD2,PPM1K,PPP4C,DUSP14,ITPK1,DUSP5,PTPRJ,PDXP,PTPN1,SGPP2                                                                               |
| D-myo-inositol-5-phosphate Metabolism                        | 2.17                    | 1.3     | SOCS3,EPHX2,PPP4R1,STYX,HACD2,PPP4C,PPM1K,DUSP14,PLCD1,ITPK1,DUSP5,PTPRJ,PDXP,PTPN1,SGPP2                                                                         |
| p38 MAPK Signaling                                           | 2.15                    | 3.5     | TGFBR2,IL33,PLA2G4E,IL36G,PLA2G2D,TNFRSF1A,IL1B,PLA2G4F,RPS6KA4,STAT1,IRAK4,IL36B                                                                                 |
| Neuroinflammation Signaling Pathway                          | 2.08                    | 1.7     | RELA,TRAF3,ICAM1,TNFRSF1A,MYD88,PIK3R1,BIRC6,MAPK6,GABBR1,CSF1R,BCL2,TGFBR2,TLR2,PLA2G4E,IRF7,PLA2G2D,IL34,GLUL,IL1B,PLA2G4F,BACE2,STAT1,BIRC3,IRAK4              |
| Death Receptor Signaling                                     | 2.04                    | 1.9     | MAP3K14,RELA,CASP6,TNFRSF1A,PARP10,PARP8,PARP12,TNFRSF15,BIRC3,BCL2                                                                                               |



**Table S5.** DMRs with inverse DNA methylation change and RNA expression change. Methylation change is expressed as  $R_{UVB} - R_{control}$ , where  $R_{UVB}$  is average methylation ratio in the UVB group and  $R_{control}$  is average methylation ratio in the Control group.

| DMR | Gene          | Location                  | Feature           | DNA Methylation          | RNA Expression                  |
|-----|---------------|---------------------------|-------------------|--------------------------|---------------------------------|
|     |               |                           |                   | change<br>UVB vs Control | change<br>$\log_2(UVB/Control)$ |
| 1   | 1700017B05Rik | chr9:57268697-57268776    | Distal Intergenic | -0.12                    | 1.26                            |
| 2   | 1700017B05Rik | chr9:57251575-57251703    | Downstream        | -0.14                    | 1.26                            |
| 3   | 5830416P10Rik | chr19:53461444-53461541   | Intron            | -0.12                    | 1.08                            |
| 4   | 5830416P10Rik | chr19:53482142-53482226   | Distal Intergenic | -0.10                    | 1.08                            |
| 5   | 5830416P10Rik | chr19:53464577-53464829   | Promoter          | -0.12                    | 1.08                            |
| 6   | Abca5         | chr11:110368147-110368197 | Distal Intergenic | 0.10                     | -1.79                           |
| 7   | Actn1         | chr12:80213441-80213557   | Intron            | 0.11                     | -1.22                           |
| 8   | Adamts14      | chr10:61242034-61242144   | Intron            | 0.10                     | -1.15                           |
| 9   | Adamts14      | chr10:61248766-61249017   | Intron            | 0.12                     | -1.15                           |
| 10  | Adap1         | chr5:139324548-139324596  | Promoter          | -0.11                    | 1.04                            |
| 11  | Adap1         | chr5:139333563-139334005  | Distal Intergenic | -0.11                    | 1.04                            |
| 12  | Adap1         | chr5:139315087-139315312  | Intron            | -0.13                    | 1.04                            |
| 13  | Adap1         | chr5:139322634-139322727  | Promoter          | -0.11                    | 1.04                            |
| 14  | Adcy6         | chr15:98602776-98602876   | Intron            | 0.11                     | -1.64                           |
| 15  | Adcy6         | chr15:98602086-98602288   | Intron            | 0.13                     | -1.64                           |
| 16  | Adcy6         | chr15:98602453-98602541   | Intron            | 0.14                     | -1.64                           |
| 17  | Adh1          | chr3:138277418-138277780  | Promoter          | 0.13                     | -1.83                           |
| 18  | Agfg2         | chr5:137673195-137673501  | Intron            | 0.13                     | -1.47                           |
| 19  | Agps          | chr2:75772709-75772960    | Distal Intergenic | -0.10                    | 1.14                            |
| 20  | Akr1b8        | chr6:34343698-34343748    | Distal Intergenic | -0.26                    | 1.68                            |
| 21  | Alox5         | chr6:116417447-116417639  | Intron            | -0.13                    | 1.32                            |
| 22  | Alox5ap       | chr5:149274900-149275100  | Intron            | -0.14                    | 1.24                            |
| 23  | Alox5ap       | chr5:149264434-149264508  | Promoter          | -0.14                    | 1.24                            |
| 24  | Ankrd44       | chr1:54888566-54888622    | Intron            | 0.10                     | -1.76                           |
| 25  | Aqp3          | chr4:41073643-41073819    | Distal Intergenic | -0.17                    | 1.04                            |
| 26  | Aqp3          | chr4:41073441-41073490    | Distal Intergenic | -0.21                    | 1.04                            |
| 27  | Arhgap9       | chr10:127324191-127324260 | Promoter          | -0.40                    | 1.12                            |
| 28  | Arl4c         | chr1:88698136-88698358    | 3' UTR            | 0.20                     | -1.33                           |
| 29  | Arl4c         | chr1:88697731-88697882    | Downstream        | 0.10                     | -1.33                           |
| 30  | Arntl2        | chr6:146776729-146776748  | 3' UTR            | -0.10                    | 1.32                            |
| 31  | Arsa          | chr15:89480644-89480688   | Intron            | 0.18                     | -2.04                           |
| 32  | Arsg          | chr11:109553572-109553710 | Intron            | 0.14                     | -1.21                           |
| 33  | Atic          | chr1:71568433-71568563    | Intron            | -0.12                    | 1.14                            |
| 34  | Atp10b        | chr11:42877322-42877420   | Distal Intergenic | 0.18                     | -1.03                           |
| 35  | Atp8a1        | chr5:67842226-67842291    | Intron            | 0.12                     | -1.08                           |
| 36  | Auts2         | chr5:132501144-132501383  | Intron            | 0.12                     | -1.06                           |
| 37  | Bmp4          | chr14:46397476-46397520   | Distal Intergenic | 0.13                     | -1.40                           |
| 38  | Bmp4          | chr14:46391579-46391949   | Promoter          | 0.16                     | -1.40                           |
| 39  | Bmp4          | chr14:46418770-46418897   | Distal Intergenic | 0.12                     | -1.40                           |
| 40  | Bst1          | chr5:43836964-43837007    | Intron            | 0.12                     | -1.14                           |
| 41  | Camk2n1       | chr4:138463107-138463189  | Distal Intergenic | 0.11                     | -1.33                           |
| 42  | Capn2         | chr1:182465985-182466102  | Downstream        | -0.12                    | 1.06                            |
| 43  | Car12         | chr9:66660030-66660227    | Distal Intergenic | -0.17                    | 1.28                            |
| 44  | Casp3         | chr8:46640029-46640108    | Distal Intergenic | -0.18                    | 1.17                            |
| 45  | Cbx7          | chr15:79931675-79931743   | Promoter          | 0.14                     | -1.43                           |
| 46  | Ccdc88b       | chr19:6854160-6854354     | Exon              | -0.11                    | 1.31                            |
| 47  | Ccdc88b       | chr19:6861943-6861974     | Distal Intergenic | -0.10                    | 1.31                            |

| <b>DMR</b> | <b>Gene</b>   | <b>Location</b>           | <b>Feature</b>    | <b>DNA Methylation<br/>change<br/>UVB vs Control</b> | <b>RNA Expression<br/>change<br/>log<sub>2</sub>(UVB/Control)</b> |
|------------|---------------|---------------------------|-------------------|------------------------------------------------------|-------------------------------------------------------------------|
| 48         | Ccdc88b       | chr19:6853901-6854028     | Exon              | -0.11                                                | 1.31                                                              |
| 49         | Ccng1         | chr11:40754087-40754194   | Promoter          | -0.17                                                | 1.35                                                              |
| 50         | Ccng1         | chr11:40871531-40871751   | Distal Intergenic | -0.11                                                | 1.35                                                              |
| 51         | Ccng1         | chr11:40775411-40775534   | Distal Intergenic | -0.10                                                | 1.35                                                              |
| 52         | Cd200         | chr16:45426864-45427151   | Intron            | -0.12                                                | 1.79                                                              |
| 53         | Cdc20         | chr4:118445612-118446060  | Exon              | -0.17                                                | 1.60                                                              |
| 54         | Cdh3          | chr8:106507743-106508063  | Promoter          | -0.20                                                | 1.14                                                              |
| 55         | Cdh3          | chr8:106508146-106508403  | Promoter          | -0.16                                                | 1.14                                                              |
| 56         | Cdk1          | chr10:69378523-69378619   | Distal Intergenic | -0.19                                                | 1.91                                                              |
| 57         | Cdk1          | chr10:69300217-69300282   | Distal Intergenic | -0.22                                                | 1.91                                                              |
| 58         | Cdk1          | chr10:69299995-69300099   | Distal Intergenic | -0.15                                                | 1.91                                                              |
| 59         | Cgn           | chr3:94783369-94783471    | Intron            | 0.13                                                 | -1.38                                                             |
| 60         | Chd7          | chr4:8799378-8799786      | Intron            | 0.12                                                 | -1.08                                                             |
| 61         | Cks1b         | chr3:89416222-89416362    | Promoter          | -0.20                                                | 1.55                                                              |
| 62         | Clybl         | chr14:122202475-122202625 | Intron            | 0.14                                                 | -1.06                                                             |
| 63         | Cotl1         | chr8:119844456-119844557  | Distal Intergenic | -0.10                                                | 1.52                                                              |
| 64         | Cotl1         | chr8:119818010-119818094  | Intron            | -0.18                                                | 1.52                                                              |
| 65         | Cpne8         | chr15:90677962-90677995   | Promoter          | -0.13                                                | 1.59                                                              |
| 66         | D17H6S56E-5   | chr17:34998943-34999270   | Promoter          | -0.17                                                | 1.75                                                              |
| 67         | D17H6S56E-5   | chr17:34998111-34998206   | Promoter          | -0.11                                                | 1.75                                                              |
| 68         | Dach1         | chr14:98181930-98182046   | Distal Intergenic | 0.15                                                 | -1.03                                                             |
| 69         | Daglb         | chr5:143434260-143434286  | Distal Intergenic | 0.28                                                 | -1.99                                                             |
| 70         | Dapk2         | chr9:66214036-66214096    | Intron            | -0.22                                                | 1.74                                                              |
| 71         | Dapk2         | chr9:66183196-66183339    | Intron            | -0.23                                                | 1.74                                                              |
| 72         | Degs2         | chr12:108704127-108704348 | Promoter          | -0.10                                                | 1.39                                                              |
| 73         | Dio2          | chr12:90799069-90799108   | Distal Intergenic | -0.16                                                | 1.58                                                              |
| 74         | Dio2          | chr12:90365561-90365695   | Distal Intergenic | -0.16                                                | 1.58                                                              |
| 75         | Dip2c         | chr13:9224480-9224563     | Distal Intergenic | 0.10                                                 | -1.02                                                             |
| 76         | Dtx3l         | chr16:35952012-35952097   | Intron            | -0.15                                                | 1.17                                                              |
| 77         | Dut           | chr2:125263441-125263474  | Distal Intergenic | -0.10                                                | 1.26                                                              |
| 78         | E130012A19Rik | chr11:97619854-97620009   | Intron            | -0.18                                                | 1.13                                                              |
| 79         | E2f1          | chr2:154568100-154568334  | Promoter          | -0.15                                                | 1.21                                                              |
| 80         | Elk3          | chr10:93306506-93306700   | Intron            | -0.24                                                | 2.10                                                              |
| 81         | Elk3          | chr10:93273528-93273550   | Intron            | -0.14                                                | 2.10                                                              |
| 82         | Enah          | chr1:182029181-182029580  | Distal Intergenic | -0.11                                                | 1.11                                                              |
| 83         | Enah          | chr1:182040535-182040634  | Distal Intergenic | -0.10                                                | 1.11                                                              |
| 84         | Enah          | chr1:182021477-182021534  | Promoter          | -0.11                                                | 1.11                                                              |
| 85         | Enah          | chr1:182064621-182064798  | Distal Intergenic | -0.16                                                | 1.11                                                              |
| 86         | Enc1          | chr13:97292526-97292731   | Distal Intergenic | 0.15                                                 | -1.51                                                             |
| 87         | Enc1          | chr13:97318006-97318171   | Distal Intergenic | 0.13                                                 | -1.51                                                             |
| 88         | Fam105a       | chr15:27671870-27672064   | Intron            | -0.12                                                | 2.06                                                              |
| 89         | Fam105a       | chr15:27752501-27752579   | Intron            | -0.11                                                | 2.06                                                              |
| 90         | Fam20c        | chr5:138770758-138771051  | Intron            | -0.24                                                | 1.43                                                              |
| 91         | Fam20c        | chr5:138756425-138756804  | Promoter          | -0.16                                                | 1.43                                                              |
| 92         | Fbln1         | chr15:85209524-85209663   | Intron            | -0.11                                                | 1.75                                                              |
| 93         | Fbln1         | chr15:85211656-85211775   | Intron            | -0.27                                                | 1.75                                                              |
| 94         | Fbln1         | chr15:85207425-85207504   | Promoter          | -0.18                                                | 1.75                                                              |
| 95         | Fchsd2        | chr7:101127593-101127748  | Intron            | 0.11                                                 | -1.25                                                             |
| 96         | Fry           | chr5:150170844-150170872  | Distal Intergenic | 0.14                                                 | -1.03                                                             |
| 97         | Fry           | chr5:150270058-150270473  | Intron            | 0.14                                                 | -1.03                                                             |
| 98         | Fry           | chr5:150233614-150233727  | Distal Intergenic | 0.16                                                 | -1.03                                                             |

| DMR | Gene     | Location                  | Feature           | DNA Methylation<br>change<br>UVB vs Control | RNA Expression<br>change<br>$\log_2(\text{UVB}/\text{Control})$ |
|-----|----------|---------------------------|-------------------|---------------------------------------------|-----------------------------------------------------------------|
| 99  | Gclm     | chr3:122247228-122247651  | Promoter          | -0.22                                       | 1.11                                                            |
| 100 | Gclm     | chr3:122246536-122246657  | Promoter          | -0.18                                       | 1.11                                                            |
| 101 | Gins1    | chr2:150908961-150909081  | Promoter          | -0.16                                       | 1.20                                                            |
| 102 | Gins1    | chr2:150927297-150927555  | Intron            | -0.17                                       | 1.20                                                            |
| 103 | Gins1    | chr2:150955138-150955236  | Intron            | -0.12                                       | 1.20                                                            |
| 104 | Gnpnat1  | chr14:45446984-45447238   | Distal Intergenic | -0.11                                       | 1.04                                                            |
| 105 | Gpr146   | chr5:139392828-139393155  | Promoter          | 0.19                                        | -2.64                                                           |
| 106 | Gpr146   | chr5:139394619-139394968  | 3' UTR            | 0.21                                        | -2.64                                                           |
| 107 | Grap     | chr11:61666292-61666371   | Intron            | -0.16                                       | 1.14                                                            |
| 108 | Grap     | chr11:61637107-61637346   | Distal Intergenic | -0.18                                       | 1.14                                                            |
| 109 | Grip1    | chr10:119814049-119814086 | Intron            | -0.16                                       | 1.22                                                            |
| 110 | Grip1    | chr10:119456061-119456082 | Promoter          | -0.26                                       | 1.22                                                            |
| 111 | Gsap     | chr5:21255438-21255518    | Intron            | -0.13                                       | 1.04                                                            |
| 112 | H6pd     | chr4:149999379-149999449  | Intron            | -0.16                                       | 2.28                                                            |
| 113 | H6pd     | chr4:149999609-149999860  | Intron            | -0.10                                       | 2.28                                                            |
| 114 | H6pd     | chr4:149999891-150000151  | Intron            | -0.23                                       | 2.28                                                            |
| 115 | H6pd     | chr4:150011683-150011767  | Promoter          | -0.10                                       | 2.28                                                            |
| 116 | Homer3   | chr8:70291827-70291902    | Intron            | -0.21                                       | 1.53                                                            |
| 117 | Hook3    | chr8:26117216-26117385    | Promoter          | 0.12                                        | -1.07                                                           |
| 118 | Hoxb5    | chr11:96301700-96302060   | Promoter          | 0.13                                        | -1.02                                                           |
| 119 | Hoxb5    | chr11:96302102-96302463   | Promoter          | 0.12                                        | -1.02                                                           |
| 120 | Hoxb5    | chr11:96301480-96301566   | Promoter          | 0.15                                        | -1.02                                                           |
| 121 | Hsf2     | chr10:57500015-57500132   | Intron            | 0.11                                        | -1.30                                                           |
| 122 | Ifitm3   | chr7:141007432-141007620  | Downstream        | -0.12                                       | 1.53                                                            |
| 123 | Igsf3    | chr3:101408962-101409433  | Intron            | -0.11                                       | 1.43                                                            |
| 124 | Impdh1   | chr6:29210517-29210667    | Promoter          | -0.15                                       | 1.02                                                            |
| 125 | Incenp   | chr19:9828853-9828907     | Distal Intergenic | -0.34                                       | 1.08                                                            |
| 126 | Irf1     | chr11:53804025-53804334   | Intron            | -0.23                                       | 1.27                                                            |
| 127 | Irf1     | chr11:53796196-53796234   | Intron            | -0.12                                       | 1.27                                                            |
| 128 | Irgm2    | chr11:58215894-58216068   | Promoter          | -0.10                                       | 1.20                                                            |
| 129 | Itgax    | chr7:128112681-128112774  | Exon              | -0.15                                       | 1.06                                                            |
| 130 | Itgb6    | chr2:60722583-60722788    | Promoter          | -0.12                                       | 1.15                                                            |
| 131 | Itgb6    | chr2:60720276-60720372    | Promoter          | -0.15                                       | 1.15                                                            |
| 132 | Itgb6    | chr2:60720474-60720530    | Promoter          | -0.11                                       | 1.15                                                            |
| 133 | Itgb6    | chr2:60722338-60722469    | Promoter          | -0.16                                       | 1.15                                                            |
| 134 | Itgb6    | chr2:60731343-60731473    | Distal Intergenic | -0.11                                       | 1.15                                                            |
| 135 | Itpk1    | chr12:102707258-102707383 | Promoter          | -0.10                                       | 2.21                                                            |
| 136 | Itpk1    | chr12:102715580-102715750 | Distal Intergenic | -0.15                                       | 2.21                                                            |
| 137 | Itpk1    | chr12:102703658-102704076 | Promoter          | -0.12                                       | 2.21                                                            |
| 138 | Kcnj12   | chr11:61027570-61027678   | Intron            | -0.10                                       | 2.11                                                            |
| 139 | Klhdc7a  | chr4:140052667-140052781  | Intron            | 0.11                                        | -1.68                                                           |
| 140 | Knstrn   | chr2:118805287-118805373  | Distal Intergenic | -0.10                                       | 1.77                                                            |
| 141 | Krt7     | chr15:101421072-101421139 | Intron            | -0.15                                       | 1.88                                                            |
| 142 | L3hypdh  | chr12:72084289-72084684   | Promoter          | -0.14                                       | 1.39                                                            |
| 143 | L3hypdh  | chr12:72082410-72082711   | Promoter          | -0.16                                       | 1.39                                                            |
| 144 | Lame2    | chr1:153101451-153101733  | Intron            | -0.19                                       | 1.03                                                            |
| 145 | Lame2    | chr1:153096178-153096295  | Intron            | -0.11                                       | 1.03                                                            |
| 146 | Lame2    | chr1:153101103-153101403  | Intron            | -0.14                                       | 1.03                                                            |
| 147 | Large    | chr8:73364519-73364649    | Distal Intergenic | 0.10                                        | -1.18                                                           |
| 148 | Lgals3bp | chr11:118379374-118379449 | Distal Intergenic | -0.15                                       | 1.44                                                            |
| 149 | Lgals9   | chr11:78983241-78983393   | Promoter          | -0.17                                       | 1.12                                                            |

| DMR | Gene      | Location                  | Feature           | DNA Methylation<br>change<br>UVB vs Control | RNA Expression<br>change<br>log <sub>2</sub> (UVB/Control) |
|-----|-----------|---------------------------|-------------------|---------------------------------------------|------------------------------------------------------------|
| 150 | Lincppara | chr15:85660742-85661017   | Distal Intergenic | 0.12                                        | -1.24                                                      |
| 151 | Lmo1      | chr7:109185652-109185861  | Distal Intergenic | -0.21                                       | 1.21                                                       |
| 152 | Lmo1      | chr7:109144730-109145220  | Intron            | -0.13                                       | 1.21                                                       |
| 153 | Lnx1      | chr5:74618273-74618364    | Intron            | 0.10                                        | -1.74                                                      |
| 154 | Manba     | chr3:135526500-135526642  | Intron            | -0.48                                       | 1.38                                                       |
| 155 | Marcks    | chr10:37223416-37223601   | Distal Intergenic | -0.11                                       | 1.06                                                       |
| 156 | Matk      | chr10:81252398-81252667   | Promoter          | 0.13                                        | -1.74                                                      |
| 157 | Mcf2l     | chr8:12951235-12951320    | Promoter          | 0.11                                        | -1.01                                                      |
| 158 | Mcm10     | chr2:5011708-5011870      | Promoter          | -0.11                                       | 1.23                                                       |
| 159 | Mcm5      | chr8:75159719-75159804    | Distal Intergenic | -0.25                                       | 1.61                                                       |
| 160 | Mcu       | chr10:59577713-59577788   | Intron            | 0.12                                        | -1.11                                                      |
| 161 | Mfge8     | chr7:79194601-79195002    | Distal Intergenic | -0.11                                       | 1.00                                                       |
| 162 | Mgst2     | chr3:51662647-51663039    | Promoter          | -0.16                                       | 1.43                                                       |
| 163 | Mgst2     | chr3:51673443-51673790    | Intron            | -0.11                                       | 1.43                                                       |
| 164 | Mgst2     | chr3:51709631-51709676    | Intron            | -0.10                                       | 1.43                                                       |
| 165 | Mgst2     | chr3:51663161-51663307    | Promoter          | -0.11                                       | 1.43                                                       |
| 166 | Mis18a    | chr16:90673929-90674318   | Distal Intergenic | -0.18                                       | 1.17                                                       |
| 167 | Mis18a    | chr16:90635591-90635695   | Distal Intergenic | -0.13                                       | 1.17                                                       |
| 168 | Mitf      | chr6:97888542-97888708    | Intron            | 0.19                                        | -1.43                                                      |
| 169 | Mllt3     | chr4:87668180-87668308    | Distal Intergenic | -0.13                                       | 1.09                                                       |
| 170 | Moxd1     | chr10:24222840-24222960   | Promoter          | -0.12                                       | 1.16                                                       |
| 171 | Mylk      | chr16:34748457-34748532   | Distal Intergenic | 0.11                                        | -1.06                                                      |
| 172 | Myo1d     | chr11:80766435-80766518   | Intron            | 0.27                                        | -1.41                                                      |
| 173 | Myo1d     | chr11:80778738-80778869   | Promoter          | 0.10                                        | -1.41                                                      |
| 174 | Myo1d     | chr11:80783618-80783744   | Distal Intergenic | 0.16                                        | -1.41                                                      |
| 175 | Myo1d     | chr11:80766800-80766876   | Intron            | 0.12                                        | -1.41                                                      |
| 176 | Myo1d     | chr11:80698367-80698555   | Intron            | 0.11                                        | -1.41                                                      |
| 177 | Ncf2      | chr1:152816798-152817258  | Exon              | -0.12                                       | 1.11                                                       |
| 178 | Nek2      | chr1:191815068-191815217  | Distal Intergenic | -0.14                                       | 1.39                                                       |
| 179 | Neur11b   | chr17:26413292-26413432   | Promoter          | -0.13                                       | 1.02                                                       |
| 180 | Neur11b   | chr17:26416207-26416293   | Promoter          | -0.19                                       | 1.02                                                       |
| 181 | Nsmce1    | chr7:125472677-125472738  | Intron            | -0.27                                       | 1.64                                                       |
| 182 | Nudt14    | chr12:112947197-112947327 | Distal Intergenic | -0.13                                       | 1.17                                                       |
| 183 | Nudt7     | chr8:114134378-114134640  | Promoter          | -0.10                                       | 1.17                                                       |
| 184 | Nudt7     | chr8:114131588-114131686  | Promoter          | -0.15                                       | 1.17                                                       |
| 185 | Nudt7     | chr8:114093830-114093854  | Distal Intergenic | -0.13                                       | 1.17                                                       |
| 186 | Odc1      | chr12:17455010-17455209   | Distal Intergenic | -0.18                                       | 1.21                                                       |
| 187 | Odc1      | chr12:17540059-17540264   | Distal Intergenic | -0.15                                       | 1.21                                                       |
| 188 | Odc1      | chr12:17481924-17482125   | Distal Intergenic | -0.22                                       | 1.21                                                       |
| 189 | Odc1      | chr12:17507106-17507203   | Distal Intergenic | -0.11                                       | 1.21                                                       |
| 190 | Odc1      | chr12:17600778-17600878   | Distal Intergenic | -0.14                                       | 1.21                                                       |
| 191 | Odc1      | chr12:17507314-17507622   | Distal Intergenic | -0.18                                       | 1.21                                                       |
| 192 | Ogfr1l    | chr1:23380198-23380588    | Promoter          | 0.15                                        | -1.17                                                      |
| 193 | Ophn1     | chrX:98890004-98890121    | Promoter          | 0.10                                        | -2.09                                                      |
| 194 | Paqr7     | chr4:134494755-134494965  | Promoter          | 0.11                                        | -1.37                                                      |
| 195 | Parp12    | chr6:39116929-39117073    | Promoter          | -0.14                                       | 1.67                                                       |
| 196 | Parp9     | chr16:35920424-35920836   | Distal Intergenic | -0.16                                       | 1.17                                                       |
| 197 | Pcdh7     | chr5:57855975-57856088    | Intron            | 0.12                                        | -1.24                                                      |
| 198 | Phgdh     | chr3:98348257-98348349    | Distal Intergenic | -0.17                                       | 1.35                                                       |
| 199 | Phyhip    | chr14:70466273-70466658   | Intron            | 0.15                                        | -1.18                                                      |
| 200 | Pik3cd    | chr4:149691350-149691669  | Intron            | 0.13                                        | -1.06                                                      |

| DMR | Gene     | Location                  | Feature           | DNA Methylation<br>change<br>UVB vs Control | RNA Expression<br>change<br>$\log_2(\text{UVB}/\text{Control})$ |
|-----|----------|---------------------------|-------------------|---------------------------------------------|-----------------------------------------------------------------|
| 201 | Pik3cd   | chr4:149674792-149674841  | Promoter          | 0.11                                        | -1.06                                                           |
| 202 | Pla2g3   | chr11:3489273-3489310     | Promoter          | 0.11                                        | -1.63                                                           |
| 203 | Plb1     | chr5:32313272-32313460    | Intron            | 0.12                                        | -1.85                                                           |
| 204 | Plb1     | chr5:32322521-32322542    | Intron            | 0.16                                        | -1.85                                                           |
| 205 | Pmaip1   | chr18:66429164-66429277   | Distal Intergenic | -0.11                                       | 1.65                                                            |
| 206 | Pmaip1   | chr18:66467873-66468055   | Distal Intergenic | -0.19                                       | 1.65                                                            |
| 207 | Pmaip1   | chr18:66468166-66468325   | Distal Intergenic | -0.24                                       | 1.65                                                            |
| 208 | Pmaip1   | chr18:66459487-66459920   | Promoter          | -0.13                                       | 1.65                                                            |
| 209 | Ppfia4   | chr1:134323025-134323089  | Exon              | 0.12                                        | -2.00                                                           |
| 210 | Pqlc3    | chr12:17000969-17001120   | Promoter          | -0.16                                       | 1.65                                                            |
| 211 | Prex1    | chr2:166712039-166712148  | Promoter          | -0.12                                       | 1.03                                                            |
| 212 | Prkar2b  | chr12:32055112-32055195   | Intron            | -0.20                                       | 1.26                                                            |
| 213 | Prkar2b  | chr12:32050325-32050452   | Intron            | -0.10                                       | 1.26                                                            |
| 214 | Prkar2b  | chr12:32104790-32104882   | Distal Intergenic | -0.11                                       | 1.26                                                            |
| 215 | Prkce    | chr17:86177659-86177935   | Intron            | 0.13                                        | -1.03                                                           |
| 216 | Psd3     | chr8:68060603-68060734    | Distal Intergenic | 0.20                                        | -1.63                                                           |
| 217 | Psd3     | chr8:67974409-67974733    | Promoter          | 0.11                                        | -1.63                                                           |
| 218 | Psd3     | chr8:68058684-68058840    | Distal Intergenic | 0.16                                        | -1.63                                                           |
| 219 | Psmg4    | chr13:34148716-34149013   | Distal Intergenic | -0.11                                       | 1.32                                                            |
| 220 | Ptp4a3   | chr15:73748834-73749024   | Promoter          | -0.25                                       | 2.07                                                            |
| 221 | Ptpn21   | chr12:98726242-98726434   | Intron            | 0.11                                        | -1.18                                                           |
| 222 | Pxdc1    | chr13:34649946-34650318   | Promoter          | -0.12                                       | 1.08                                                            |
| 223 | Pxdc1    | chr13:34647293-34647726   | Intron            | -0.13                                       | 1.08                                                            |
| 224 | Rab31    | chr17:65771439-65771806   | Promoter          | -0.22                                       | 1.22                                                            |
| 225 | Rab31    | chr17:65771104-65771306   | Promoter          | -0.15                                       | 1.22                                                            |
| 226 | Rab31    | chr17:65727261-65727307   | Intron            | -0.22                                       | 1.22                                                            |
| 227 | Rab31    | chr17:65724196-65724483   | Intron            | -0.14                                       | 1.22                                                            |
| 228 | Racgap1  | chr15:99628210-99628248   | Intron            | -0.15                                       | 1.66                                                            |
| 229 | Racgap1  | chr15:99653511-99653591   | Promoter          | -0.10                                       | 1.66                                                            |
| 230 | Rbp1     | chr9:98418044-98418264    | Distal Intergenic | -0.13                                       | 1.95                                                            |
| 231 | Rgs10    | chr7:128433713-128433774  | Distal Intergenic | 0.25                                        | -1.42                                                           |
| 232 | Rhobtb1  | chr10:69269943-69270388   | Exon              | 0.11                                        | -1.93                                                           |
| 233 | Rilpl1   | chr5:124528669-124528773  | Promoter          | -0.19                                       | 1.18                                                            |
| 234 | Rilpl1   | chr5:124530335-124530415  | Promoter          | -0.23                                       | 1.18                                                            |
| 235 | Rnasel   | chr1:153751770-153751984  | Promoter          | -0.10                                       | 2.54                                                            |
| 236 | Rnf152   | chr1:105354982-105355253  | Promoter          | -0.10                                       | 1.28                                                            |
| 237 | Rnf152   | chr1:105357972-105358018  | Promoter          | -0.46                                       | 1.28                                                            |
| 238 | Rptn     | chr3:93378431-93378578    | Distal Intergenic | -0.15                                       | 1.13                                                            |
| 239 | Rrm2     | chr12:24705658-24705760   | Promoter          | -0.15                                       | 1.39                                                            |
| 240 | Rtn4r11  | chr11:75235334-75235394   | Intron            | 0.36                                        | -1.18                                                           |
| 241 | Selplg   | chr5:113842825-113842911  | 3' UTR            | -0.41                                       | 1.31                                                            |
| 242 | Selplg   | chr5:113843037-113843325  | 3' UTR            | -0.27                                       | 1.31                                                            |
| 243 | Selplg   | chr5:113843983-113844462  | 3' UTR            | -0.18                                       | 1.31                                                            |
| 244 | Serpinh1 | chr7:99329621-99329834    | Intron            | -0.15                                       | 1.09                                                            |
| 245 | Sfxn5    | chr6:85287982-85288069    | Intron            | 0.13                                        | -1.74                                                           |
| 246 | Shroom3  | chr5:92936050-92936265    | Intron            | 0.11                                        | -1.02                                                           |
| 247 | Siva1    | chr12:112648445-112648519 | Intron            | -0.15                                       | 1.68                                                            |
| 248 | Slc1a1   | chr19:28773245-28773324   | Distal Intergenic | 0.16                                        | -1.40                                                           |
| 249 | Slc1a5   | chr7:16783150-16783292    | Promoter          | -0.11                                       | 1.12                                                            |
| 250 | Slc1a5   | chr7:16780139-16780235    | Promoter          | -0.11                                       | 1.12                                                            |
| 251 | Slc24a3  | chr2:145168809-145168928  | Distal Intergenic | 0.12                                        | -2.24                                                           |

| DMR | Gene      | Location                  | Feature           | DNA Methylation<br>change<br>UVB vs Control | RNA Expression<br>change<br>$\log_2(\text{UVB}/\text{Control})$ |
|-----|-----------|---------------------------|-------------------|---------------------------------------------|-----------------------------------------------------------------|
| 252 | Slc24a3   | chr2:145170090-145170236  | Distal Intergenic | 0.29                                        | -2.24                                                           |
| 253 | Slc24a3   | chr2:145233006-145233132  | Distal Intergenic | 0.11                                        | -2.24                                                           |
| 254 | Slc24a3   | chr2:145169073-145169269  | Distal Intergenic | 0.18                                        | -2.24                                                           |
| 255 | Slc2a1    | chr4:119111465-119111510  | Promoter          | -0.17                                       | 1.08                                                            |
| 256 | Slc39a14  | chr14:70341275-70341597   | Intron            | -0.10                                       | 1.76                                                            |
| 257 | Slc39a14  | chr14:70370733-70370743   | Downstream        | -0.14                                       | 1.76                                                            |
| 258 | Slc52a3   | chr2:152002406-152002471  | Promoter          | 0.15                                        | -1.19                                                           |
| 259 | Slc9a9    | chr9:94691706-94691868    | Intron            | 0.12                                        | -1.86                                                           |
| 260 | Slfn2     | chr11:83066604-83066962   | Promoter          | -0.12                                       | 2.01                                                            |
| 261 | Slfn2     | chr11:83079783-83079891   | Distal Intergenic | -0.15                                       | 2.01                                                            |
| 262 | Smim3     | chr18:60500264-60500508   | Promoter          | -0.14                                       | 3.01                                                            |
| 263 | Smim3     | chr18:60502924-60503036   | Promoter          | -0.17                                       | 3.01                                                            |
| 264 | Smyd3     | chr1:179198093-179198267  | Intron            | 0.13                                        | -1.30                                                           |
| 265 | Snn       | chr16:11051653-11051744   | Distal Intergenic | -0.15                                       | 1.36                                                            |
| 266 | Sorbs1    | chr19:40514300-40514417   | Promoter          | 0.27                                        | -1.14                                                           |
| 267 | Srgn      | chr10:62498947-62498997   | Intron            | -0.28                                       | 1.66                                                            |
| 268 | Srgn      | chr10:62505093-62505215   | Promoter          | -0.10                                       | 1.66                                                            |
| 269 | Srgn      | chr10:62517585-62517781   | Distal Intergenic | -0.14                                       | 1.66                                                            |
| 270 | Stat1     | chr1:52132164-52132297    | Intron            | -0.11                                       | 1.02                                                            |
| 271 | Stom      | chr2:35349083-35349351    | Distal Intergenic | -0.11                                       | 2.43                                                            |
| 272 | Stom      | chr2:35327466-35327619    | Intron            | -0.29                                       | 2.43                                                            |
| 273 | Stom      | chr2:35339026-35339189    | Promoter          | -0.16                                       | 2.43                                                            |
| 274 | Stom      | chr2:35328072-35328178    | Intron            | -0.11                                       | 2.43                                                            |
| 275 | Syt8      | chr7:142418749-142418905  | Distal Intergenic | -0.25                                       | 1.09                                                            |
| 276 | Syt8      | chr7:142419052-142419156  | Distal Intergenic | -0.20                                       | 1.09                                                            |
| 277 | Tbc1d1    | chr5:64236576-64236776    | Intron            | 0.12                                        | -1.23                                                           |
| 278 | Tk1       | chr11:117830243-117830696 | Intron            | -0.11                                       | 1.34                                                            |
| 279 | Tmem158   | chr9:123258764-123259008  | Promoter          | -0.24                                       | 1.21                                                            |
| 280 | Tmem158   | chr9:123259111-123259207  | Promoter          | -0.18                                       | 1.21                                                            |
| 281 | Tmem229a  | chr6:24954595-24954673    | Promoter          | 0.10                                        | -2.14                                                           |
| 282 | Tmprss11a | chr5:86474051-86474313    | Distal Intergenic | -0.21                                       | 1.38                                                            |
| 283 | Tnfrsf11a | chr1:105843217-105843491  | Intron            | 0.11                                        | -1.15                                                           |
| 284 | Tnxb      | chr17:34667889-34667943   | Promoter          | 0.12                                        | -1.20                                                           |
| 285 | Tspan3    | chr9:56264440-56264560    | Intron            | -0.14                                       | 1.87                                                            |
| 286 | Tubb3     | chr8:123413648-123413900  | Promoter          | -0.12                                       | 1.44                                                            |
| 287 | Upp1      | chr11:9120688-9120727     | Promoter          | 0.11                                        | -1.91                                                           |
| 288 | Vrk1      | chr12:105937352-105937733 | Distal Intergenic | -0.14                                       | 1.01                                                            |
| 289 | Wwox      | chr8:114876284-114876704  | Intron            | 0.11                                        | -1.52                                                           |
| 290 | Wwox      | chr8:114899107-114899524  | Intron            | 0.12                                        | -1.52                                                           |
| 291 | Xdh       | chr17:73893425-73893583   | Intron            | -0.17                                       | 1.11                                                            |
| 292 | Xdh       | chr17:73918894-73918953   | Intron            | -0.15                                       | 1.11                                                            |
| 293 | Xdh       | chr17:73894331-73894436   | Intron            | -0.18                                       | 1.11                                                            |
| 294 | Xdh       | chr17:73894662-73894747   | Intron            | -0.48                                       | 1.11                                                            |
| 295 | Zfp365    | chr10:67786309-67786485   | Distal Intergenic | -0.11                                       | 1.54                                                            |
| 296 | Zfp365    | chr10:67932461-67932752   | Distal Intergenic | -0.12                                       | 1.54                                                            |

**Table S6.** DMRs with non-inverse DNA methylation change and RNA expression change. Methylation change is expressed as  $R_{UVB} - R_{Control}$ , where  $R_{UVB}$  is average methylation ratio in the UVB group and  $R_{Control}$  is average methylation ratio in the Control group.

| DMR | Gene          | Location                  | Feature           | DNA Methylation          | RNA Expression                  |
|-----|---------------|---------------------------|-------------------|--------------------------|---------------------------------|
|     |               |                           |                   | change<br>UVB vs Control | change<br>$\log_2(UVB/Control)$ |
| 1   | 1110059E24Rik | chr19:21630639-21630710   | Intron            | 0.12                     | 1.13                            |
| 2   | 2700094K13Rik | chr2:84671277-84671379    | Promoter          | 0.10                     | 1.61                            |
| 3   | 4930404N11Rik | chr10:81365315-81365451   | Promoter          | -0.11                    | -1.02                           |
| 4   | 9030617O03Rik | chr12:100835555-100835578 | Intron            | 0.33                     | 1.75                            |
| 5   | A4galt        | chr15:83297201-83297389   | Downstream        | -0.15                    | -1.18                           |
| 6   | Abi3bp        | chr16:56456044-56456112   | Distal Intergenic | -0.19                    | -1.34                           |
| 7   | Ackr3         | chr1:90203151-90203164    | Promoter          | 0.21                     | 1.33                            |
| 8   | Ackr3         | chr1:90202624-90203050    | Promoter          | 0.12                     | 1.33                            |
| 9   | Actn1         | chr12:80223225-80223692   | Intron            | -0.11                    | -1.22                           |
| 10  | Actn1         | chr12:80224631-80224787   | Intron            | -0.18                    | -1.22                           |
| 11  | Actn1         | chr12:80257694-80257736   | Promoter          | -0.14                    | -1.22                           |
| 12  | Actn1         | chr12:80258701-80258888   | Promoter          | -0.11                    | -1.22                           |
| 13  | Actn1         | chr12:80210019-80210160   | Intron            | -0.11                    | -1.22                           |
| 14  | Actn1         | chr12:80224903-80224955   | Intron            | -0.13                    | -1.22                           |
| 15  | Adam19        | chr11:46070375-46070478   | Intron            | -0.10                    | -1.52                           |
| 16  | Adam19        | chr11:46064845-46065080   | 5' UTR            | -0.19                    | -1.52                           |
| 17  | Adcy6         | chr15:98607865-98607965   | Promoter          | -0.15                    | -1.64                           |
| 18  | Adcy6         | chr15:98594191-98594686   | Exon              | -0.14                    | -1.64                           |
| 19  | Adcy6         | chr15:98608467-98608498   | Promoter          | -0.21                    | -1.64                           |
| 20  | Adgra2        | chr5:50056936-50057076    | Promoter          | -0.15                    | -1.47                           |
| 21  | Adgra2        | chr5:50057264-50057349    | Promoter          | -0.12                    | -1.47                           |
| 22  | Adh1          | chr3:138276412-138276431  | Promoter          | -0.13                    | -1.83                           |
| 23  | Adh1          | chr3:138276547-138276636  | Promoter          | -0.10                    | -1.83                           |
| 24  | Akap7         | chr10:25295180-25295333   | Intron            | -0.14                    | -1.19                           |
| 25  | Aldh1a3       | chr7:66498069-66498114    | Distal Intergenic | 0.19                     | 2.12                            |
| 26  | Alox12        | chr11:70273458-70273517   | Distal Intergenic | -0.11                    | -1.21                           |
| 27  | Ankrd23       | chr1:36533860-36533913    | Promoter          | -0.11                    | -1.78                           |
| 28  | Arhgap44      | chr11:65100153-65100423   | Intron            | -0.10                    | -1.11                           |
| 29  | Arhgap9       | chr10:127323127-127323180 | Promoter          | 0.17                     | 1.12                            |
| 30  | Arl4c         | chr1:88705463-88705573    | Distal Intergenic | -0.11                    | -1.33                           |
| 31  | Arsa          | chr15:89481039-89481180   | Intron            | -0.12                    | -2.04                           |
| 32  | Arsg          | chr11:109509183-109509379 | Intron            | -0.13                    | -1.21                           |
| 33  | Atp8a1        | chr5:67845806-67846293    | Promoter          | -0.12                    | -1.08                           |
| 34  | Atp8a1        | chr5:67797973-67798070    | Intron            | -0.21                    | -1.08                           |
| 35  | Atp8a1        | chr5:67845314-67845480    | Promoter          | -0.12                    | -1.08                           |
| 36  | Bach2         | chr4:32338041-32338144    | Distal Intergenic | -0.11                    | -2.05                           |
| 37  | Bach2         | chr4:32245919-32246260    | Distal Intergenic | -0.13                    | -2.05                           |
| 38  | Bach2         | chr4:32342286-32342517    | Distal Intergenic | -0.10                    | -2.05                           |
| 39  | Bach2         | chr4:32304719-32304791    | Distal Intergenic | -0.13                    | -2.05                           |
| 40  | Bach2         | chr4:32249559-32249583    | Distal Intergenic | -0.12                    | -2.05                           |
| 41  | Bmp4          | chr14:46389783-46389869   | Promoter          | -0.15                    | -1.40                           |
| 42  | Btc           | chr5:91404583-91404615    | Promoter          | -0.13                    | -1.34                           |
| 43  | C1s1          | chr6:124528213-124528384  | Downstream        | 0.17                     | 2.60                            |
| 44  | Camk2n1       | chr4:138449132-138449156  | Distal Intergenic | -0.15                    | -1.33                           |
| 45  | Ccdc50        | chr16:27423476-27423546   | Intron            | -0.13                    | -1.39                           |
| 46  | Ccdc88b       | chr19:6857649-6857676     | Promoter          | 0.47                     | 1.31                            |
| 47  | Ccne1         | chr7:38074957-38075079    | Distal Intergenic | 0.33                     | 1.90                            |

| DMR | Gene     | Location                  | Feature           | DNA Methylation<br>change<br>UVB vs Control | RNA Expression<br>change<br>$\log_2(\text{UVB}/\text{Control})$ |
|-----|----------|---------------------------|-------------------|---------------------------------------------|-----------------------------------------------------------------|
| 48  | Chd7     | chr4:8745829-8745967      | Intron            | -0.15                                       | -1.08                                                           |
| 49  | Chd7     | chr4:8692583-8693056      | Promoter          | -0.11                                       | -1.08                                                           |
| 50  | Ciita    | chr16:10479194-10479229   | Promoter          | 0.10                                        | 1.01                                                            |
| 51  | Cldn23   | chr8:35851957-35852077    | Distal Intergenic | -0.10                                       | -1.15                                                           |
| 52  | Cotl1    | chr8:119813035-119813053  | Intron            | 0.24                                        | 1.52                                                            |
| 53  | Cryl1    | chr14:57332540-57332648   | Intron            | -0.12                                       | -1.41                                                           |
| 54  | Cttnbp2  | chr6:18435270-18435370    | Exon              | -0.11                                       | -1.01                                                           |
| 55  | Cttnbp2  | chr6:18434290-18434536    | Exon              | -0.11                                       | -1.01                                                           |
| 56  | Cttnbp2  | chr6:18436255-18436443    | Intron            | -0.14                                       | -1.01                                                           |
| 57  | Cyp39a1  | chr17:43685218-43685429   | Exon              | -0.13                                       | -1.67                                                           |
| 58  | Dach1    | chr14:98166694-98166848   | Promoter          | -0.14                                       | -1.03                                                           |
| 59  | Dlgap5   | chr14:47406261-47406358   | Exon              | 0.12                                        | 1.33                                                            |
| 60  | Dnaaf3   | chr7:4527963-4528065      | Exon              | 0.17                                        | 1.21                                                            |
| 61  | Dnajb5   | chr4:42951738-42951848    | Promoter          | -0.10                                       | -1.09                                                           |
| 62  | Dnajb5   | chr4:42938678-42938744    | Exon              | -0.25                                       | -1.09                                                           |
| 63  | Dync2h1  | chr9:6801111-6801177      | Distal Intergenic | -0.17                                       | -1.30                                                           |
| 64  | Elk3     | chr10:93311708-93311816   | Promoter          | 0.12                                        | 2.10                                                            |
| 65  | Enc1     | chr13:97242811-97243012   | Promoter          | -0.11                                       | -1.51                                                           |
| 66  | Enc1     | chr13:97243900-97244126   | Promoter          | -0.14                                       | -1.51                                                           |
| 67  | Enc1     | chr13:97299186-97299248   | Distal Intergenic | -0.17                                       | -1.51                                                           |
| 68  | Enc1     | chr13:97242379-97242564   | Promoter          | -0.17                                       | -1.51                                                           |
| 69  | Enc1     | chr13:97244231-97244517   | Intron            | -0.12                                       | -1.51                                                           |
| 70  | Enc1     | chr13:97249962-97250137   | Intron            | -0.12                                       | -1.51                                                           |
| 71  | Fam105a  | chr15:27802583-27802770   | Intron            | 0.10                                        | 2.06                                                            |
| 72  | Fam49b   | chr15:64118377-64118633   | Intron            | 0.14                                        | 1.45                                                            |
| 73  | Fam49b   | chr15:64142554-64142605   | Intron            | 0.21                                        | 1.45                                                            |
| 74  | Fanci    | chr7:79424266-79424389    | Exon              | 0.11                                        | 1.04                                                            |
| 75  | Fbln1    | chr15:85267106-85267293   | Intron            | 0.13                                        | 1.75                                                            |
| 76  | Fbxo10   | chr4:45083159-45083221    | Promoter          | 0.15                                        | 1.01                                                            |
| 77  | Fgd4     | chr16:16525392-16525520   | Promoter          | -0.13                                       | -1.18                                                           |
| 78  | Gan      | chr8:117198525-117198878  | Intron            | -0.22                                       | -1.31                                                           |
| 79  | Gjb6     | chr14:57131898-57131940   | Promoter          | 0.10                                        | 1.31                                                            |
| 80  | Gnpnat1  | chr14:45400134-45400352   | Distal Intergenic | 0.16                                        | 1.04                                                            |
| 81  | Gnpnat1  | chr14:45445039-45445497   | Distal Intergenic | 0.21                                        | 1.04                                                            |
| 82  | Golga7b  | chr19:42257752-42257897   | Promoter          | -0.19                                       | -2.22                                                           |
| 83  | Grip1    | chr10:119979927-119980347 | Intron            | 0.10                                        | 1.22                                                            |
| 84  | Hddc2    | chr10:31209200-31209316   | Distal Intergenic | 0.22                                        | 1.04                                                            |
| 85  | Helz2    | chr2:181244965-181245052  | Promoter          | 0.10                                        | 1.04                                                            |
| 86  | Hsd17b14 | chr7:45551806-45551895    | Intron            | -0.12                                       | -1.48                                                           |
| 87  | Icosl    | chr10:78114727-78114873   | Distal Intergenic | 0.14                                        | 1.99                                                            |
| 88  | Igsf3    | chr3:101464293-101464686  | Distal Intergenic | 0.11                                        | 1.43                                                            |
| 89  | Il33     | chr19:29948048-29948204   | Promoter          | 0.10                                        | 2.06                                                            |
| 90  | Inpp5d   | chr1:87673979-87674033    | Intron            | 0.19                                        | 1.12                                                            |
| 91  | Inpp5d   | chr1:87620116-87620166    | Promoter          | 0.10                                        | 1.12                                                            |
| 92  | Inpp5d   | chr1:87659256-87659487    | Intron            | 0.13                                        | 1.12                                                            |
| 93  | Iqsec2   | chrX:152175209-152175327  | Intron            | -0.11                                       | -1.10                                                           |
| 94  | Iqsec2   | chrX:152147431-152147545  | Intron            | -0.12                                       | -1.10                                                           |
| 95  | Irs1     | chr1:82287465-82287744    | Exon              | -0.11                                       | -2.14                                                           |
| 96  | Isoc2a   | chr7:4891220-4891319      | Exon              | 0.10                                        | 1.24                                                            |
| 97  | Isoc2a   | chr7:4895339-4895461      | 3' UTR            | 0.27                                        | 1.24                                                            |
| 98  | Itga2b   | chr11:102487881-102487994 | Intron            | 0.11                                        | 2.05                                                            |



| DMR | Gene      | Location                  | Feature           | DNA Methylation          | RNA Expression                           |
|-----|-----------|---------------------------|-------------------|--------------------------|------------------------------------------|
|     |           |                           |                   | change<br>UVB vs Control | change<br>log <sub>2</sub> (UVB/Control) |
| 99  | Kazald1   | chr19:45078046-45078428   | Promoter          | -0.12                    | -1.72                                    |
| 100 | Kazald1   | chr19:45067475-45067794   | Distal Intergenic | -0.12                    | -1.72                                    |
| 101 | Kcnab3    | chr11:69327749-69327824   | Promoter          | -0.13                    | -1.20                                    |
| 102 | Kcnj15    | chr16:95341494-95341506   | Distal Intergenic | 0.12                     | 1.14                                     |
| 103 | Lamc2     | chr1:153073284-153073372  | Intron            | 0.13                     | 1.03                                     |
| 104 | Large     | chr8:73750700-73750898    | Distal Intergenic | -0.12                    | -1.18                                    |
| 105 | Ldlrad3   | chr2:102126620-102126716  | Intron            | -0.11                    | -1.46                                    |
| 106 | Lincppara | chr15:85654071-85654262   | Distal Intergenic | -0.15                    | -1.24                                    |
| 107 | Lmo1      | chr7:109168720-109168916  | Promoter          | 0.12                     | 1.21                                     |
| 108 | Lnx1      | chr5:74796561-74796651    | Distal Intergenic | -0.10                    | -1.74                                    |
| 109 | Lnx1      | chr5:74703553-74703661    | Promoter          | -0.15                    | -1.74                                    |
| 110 | Magi1     | chr6:93445575-93445732    | Distal Intergenic | -0.10                    | -1.79                                    |
| 111 | Magi1     | chr6:93924567-93924601    | Intron            | -0.18                    | -1.79                                    |
| 112 | Magi1     | chr6:93445163-93445197    | Distal Intergenic | -0.11                    | -1.79                                    |
| 113 | Mapt      | chr11:104305929-104306016 | Intron            | -0.13                    | -1.51                                    |
| 114 | Mapt      | chr11:104310749-104310881 | Intron            | -0.11                    | -1.51                                    |
| 115 | Mareks    | chr10:37232065-37232191   | Distal Intergenic | 0.12                     | 1.06                                     |
| 116 | Matk      | chr10:81258230-81258384   | Promoter          | -0.11                    | -1.74                                    |
| 117 | Mcf2l     | chr8:12891253-12891569    | Distal Intergenic | -0.13                    | -1.01                                    |
| 118 | Mcm2      | chr6:88893915-88894109    | Intron            | 0.10                     | 1.34                                     |
| 119 | Mdfi      | chr17:47815256-47815412   | 3' UTR            | 0.13                     | 1.03                                     |
| 120 | Mdfi      | chr17:47821591-47821682   | Intron            | 0.17                     | 1.03                                     |
| 121 | Mdfi      | chr17:47811409-47811630   | Distal Intergenic | 0.12                     | 1.03                                     |
| 122 | Mgst2     | chr3:51668716-51668875    | Intron            | 0.11                     | 1.43                                     |
| 123 | Mitf      | chr6:97855635-97855780    | Intron            | -0.19                    | -1.43                                    |
| 124 | Mllt3     | chr4:87930772-87930931    | Intron            | 0.10                     | 1.09                                     |
| 125 | Mtmr12    | chr15:12194302-12194388   | Distal Intergenic | -0.12                    | -1.01                                    |
| 126 | Myo5a     | chr9:75085667-75085751    | Intron            | -0.11                    | -1.15                                    |
| 127 | Nceh1     | chr3:27237695-27237890    | Intron            | 0.14                     | 1.37                                     |
| 128 | Ncf2      | chr1:152816584-152816660  | Intron            | 0.13                     | 1.11                                     |
| 129 | Ncf2      | chr1:152815265-152815368  | Intron            | 0.11                     | 1.11                                     |
| 130 | Pde1b     | chr15:103518974-103519011 | Intron            | -0.14                    | -1.01                                    |
| 131 | Pde1b     | chr15:103504235-103504257 | Promoter          | -0.13                    | -1.01                                    |
| 132 | Pdzn3     | chr6:101293433-101293490  | Intron            | -0.14                    | -1.16                                    |
| 133 | Pdzn3     | chr6:101289866-101289960  | Intron            | -0.16                    | -1.16                                    |
| 134 | Pik3cd    | chr4:149702620-149703047  | Promoter          | -0.15                    | -1.06                                    |
| 135 | Plet1     | chr9:50443710-50444001    | Distal Intergenic | -0.10                    | -1.11                                    |
| 136 | Pmaip1    | chr18:66427199-66427337   | Distal Intergenic | 0.12                     | 1.65                                     |
| 137 | Pnkd      | chr1:74331588-74331810    | Promoter          | -0.11                    | -1.19                                    |
| 138 | Pnkd      | chr1:74335237-74335306    | Promoter          | -0.12                    | -1.19                                    |
| 139 | Ppfia4    | chr1:134328334-134328417  | Exon              | -0.12                    | -2.00                                    |
| 140 | Prkar2b   | chr12:32111822-32112005   | Distal Intergenic | 0.14                     | 1.26                                     |
| 141 | Prkar2b   | chr12:32113157-32113364   | Distal Intergenic | 0.18                     | 1.26                                     |
| 142 | Ptp4a3    | chr15:73717486-73717526   | Distal Intergenic | 0.16                     | 2.07                                     |
| 143 | Pvrl3     | chr16:46592795-46592971   | Distal Intergenic | -0.11                    | -1.37                                    |
| 144 | Pxdc1     | chr13:34635983-34636067   | Intron            | 0.14                     | 1.08                                     |
| 145 | Rab44     | chr17:29169101-29169162   | Intron            | -0.22                    | -1.61                                    |
| 146 | Rapgef2   | chr3:79066505-79066869    | Exon              | -0.11                    | -1.30                                    |
| 147 | Rapgef2   | chr3:78933105-78933237    | Distal Intergenic | -0.11                    | -1.30                                    |
| 148 | Rapgef2   | chr3:79086277-79086445    | Intron            | -0.16                    | -1.30                                    |
| 149 | Rapgef4   | chr2:72137248-72137297    | Exon              | -0.13                    | -1.03                                    |

| DMR | Gene       | Location                  | Feature           | DNA Methylation          | RNA Expression                           |
|-----|------------|---------------------------|-------------------|--------------------------|------------------------------------------|
|     |            |                           |                   | change<br>UVB vs Control | change<br>log <sub>2</sub> (UVB/Control) |
| 150 | Rgs10      | chr7:128399063-128399169  | Intron            | -0.23                    | -1.42                                    |
| 151 | Rhobtb1    | chr10:69218958-69219273   | Intron            | -0.10                    | -1.93                                    |
| 152 | Rnf152     | chr1:105095406-105095612  | Distal Intergenic | 0.11                     | 1.28                                     |
| 153 | Rtn4r11    | chr11:75215291-75215353   | Intron            | -0.14                    | -1.18                                    |
| 154 | Sema6a     | chr18:47330180-47330227   | Intron            | -0.12                    | -1.61                                    |
| 155 | Sh3tc2     | chr18:61955953-61956043   | Promoter          | -0.17                    | -1.92                                    |
| 156 | Sigirr     | chr7:141096881-141096966  | Intron            | -0.17                    | -1.22                                    |
| 157 | Siva1      | chr12:112634472-112634631 | Exon              | 0.10                     | 1.68                                     |
| 158 | Slc1a1     | chr19:28862439-28862574   | Intron            | -0.19                    | -1.40                                    |
| 159 | Slc1a5     | chr7:16760471-16760668    | Distal Intergenic | 0.19                     | 1.12                                     |
| 160 | Slc46a1    | chr11:78454697-78454967   | Distal Intergenic | -0.11                    | -1.04                                    |
| 161 | Slc46a1    | chr11:78454355-78454646   | Distal Intergenic | -0.13                    | -1.04                                    |
| 162 | Slc52a3    | chr2:152020753-152020937  | Distal Intergenic | -0.19                    | -1.19                                    |
| 163 | Slc9a9     | chr9:94681213-94681297    | Intron            | -0.21                    | -1.86                                    |
| 164 | Slfn8      | chr11:83019924-83019950   | Promoter          | 0.16                     | 1.13                                     |
| 165 | Smyd3      | chr1:179108432-179108532  | Intron            | -0.13                    | -1.30                                    |
| 166 | Sntb1      | chr15:55758521-55758659   | Intron            | -0.13                    | -1.51                                    |
| 167 | Sntb1      | chr15:55877289-55877408   | Intron            | -0.10                    | -1.51                                    |
| 168 | Snx10      | chr6:51586532-51586635    | Intron            | 0.10                     | 1.51                                     |
| 169 | Sorbs1     | chr19:40464776-40464971   | Intron            | -0.13                    | -1.14                                    |
| 170 | Sorbs1     | chr19:40477185-40477335   | Intron            | -0.18                    | -1.14                                    |
| 171 | Srgap1     | chr10:121902628-121902858 | Intron            | -0.13                    | -1.10                                    |
| 172 | St3gal2    | chr8:110946947-110947002  | Intron            | 0.14                     | 1.03                                     |
| 173 | St3gal2    | chr8:110949588-110949756  | Intron            | 0.26                     | 1.03                                     |
| 174 | St6galnac2 | chr11:116695641-116696027 | Promoter          | -0.11                    | -1.14                                    |
| 175 | St6galnac2 | chr11:116697752-116697916 | Distal Intergenic | -0.12                    | -1.14                                    |
| 176 | St6galnac2 | chr11:116696229-116696521 | Promoter          | -0.19                    | -1.14                                    |
| 177 | Stat1      | chr1:52146669-52146811    | Intron            | 0.15                     | 1.02                                     |
| 178 | Stat1      | chr1:52149935-52150413    | Intron            | 0.11                     | 1.02                                     |
| 179 | Syne1      | chr10:4996424-4996482     | Intron            | -0.13                    | -2.31                                    |
| 180 | Tbc1d24    | chr17:24199377-24199484   | Promoter          | -0.23                    | -1.87                                    |
| 181 | Tbc1d24    | chr17:24207100-24207257   | Promoter          | -0.14                    | -1.87                                    |
| 182 | Tesc       | chr5:118063416-118063477  | Downstream        | -0.15                    | -1.70                                    |
| 183 | Tmem177    | chr1:119894947-119895026  | Distal Intergenic | -0.11                    | -1.59                                    |
| 184 | Tmem229a   | chr6:24913589-24913696    | Distal Intergenic | -0.14                    | -2.14                                    |
| 185 | Tnxb       | chr17:34671449-34671914   | Promoter          | -0.14                    | -1.20                                    |
| 186 | Tnxb       | chr17:34670964-34671437   | Promoter          | -0.11                    | -1.20                                    |
| 187 | Tnxb       | chr17:34671928-34672387   | Promoter          | -0.12                    | -1.20                                    |
| 188 | Trappc9    | chr15:73003893-73003991   | Intron            | -0.10                    | -1.19                                    |
| 189 | Trim2      | chr3:84294301-84294329    | Intron            | -0.17                    | -1.65                                    |
| 190 | Trim2      | chr3:84271821-84272109    | Promoter          | -0.15                    | -1.65                                    |
| 191 | Ttll7      | chr3:147335188-147335364  | Distal Intergenic | 0.16                     | 1.69                                     |
| 192 | Ttll7      | chr3:147098353-147098567  | Distal Intergenic | 0.13                     | 1.69                                     |
| 193 | Tubb6      | chr18:67396783-67396949   | Intron            | 0.12                     | 1.81                                     |
| 194 | Vrk1       | chr12:106034558-106034619 | Intron            | 0.12                     | 1.01                                     |
| 195 | Vrk1       | chr12:106199489-106199568 | Distal Intergenic | 0.11                     | 1.01                                     |
| 196 | Wnt10a     | chr1:74793878-74794026    | Promoter          | 0.11                     | 1.02                                     |
| 197 | Wwox       | chr8:114440604-114440769  | Promoter          | -0.10                    | -1.52                                    |
| 198 | Wwox       | chr8:114452425-114452516  | Intron            | -0.27                    | -1.52                                    |
| 199 | Wwox       | chr8:114883032-114883182  | Intron            | -0.11                    | -1.52                                    |
| 200 | Wwox       | chr8:114837977-114838106  | Intron            | -0.16                    | -1.52                                    |

| <b>DMR</b> | <b>Gene</b> | <b>Location</b>          | <b>Feature</b> | <b>DNA Methylation<br/>change<br/>UVB vs Control</b> | <b>RNA Expression<br/>change<br/>log<sub>2</sub>(UVB/Control)</b> |
|------------|-------------|--------------------------|----------------|------------------------------------------------------|-------------------------------------------------------------------|
| 201        | Wwox        | chr8:114629899-114630153 | Intron         | -0.12                                                | -1.52                                                             |
| 202        | Wwox        | chr8:114716494-114716803 | Intron         | -0.13                                                | -1.52                                                             |
| 203        | Wwox        | chr8:114591920-114592220 | Intron         | -0.15                                                | -1.52                                                             |
| 204        | Wwox        | chr8:114591725-114591791 | Intron         | -0.17                                                | -1.52                                                             |
| 205        | Ypel2       | chr11:86906564-86906648  | Intron         | -0.17                                                | -1.30                                                             |
| 206        | Ypel2       | chr11:86937873-86938071  | 3' UTR         | -0.16                                                | -1.30                                                             |

**Figure S1**

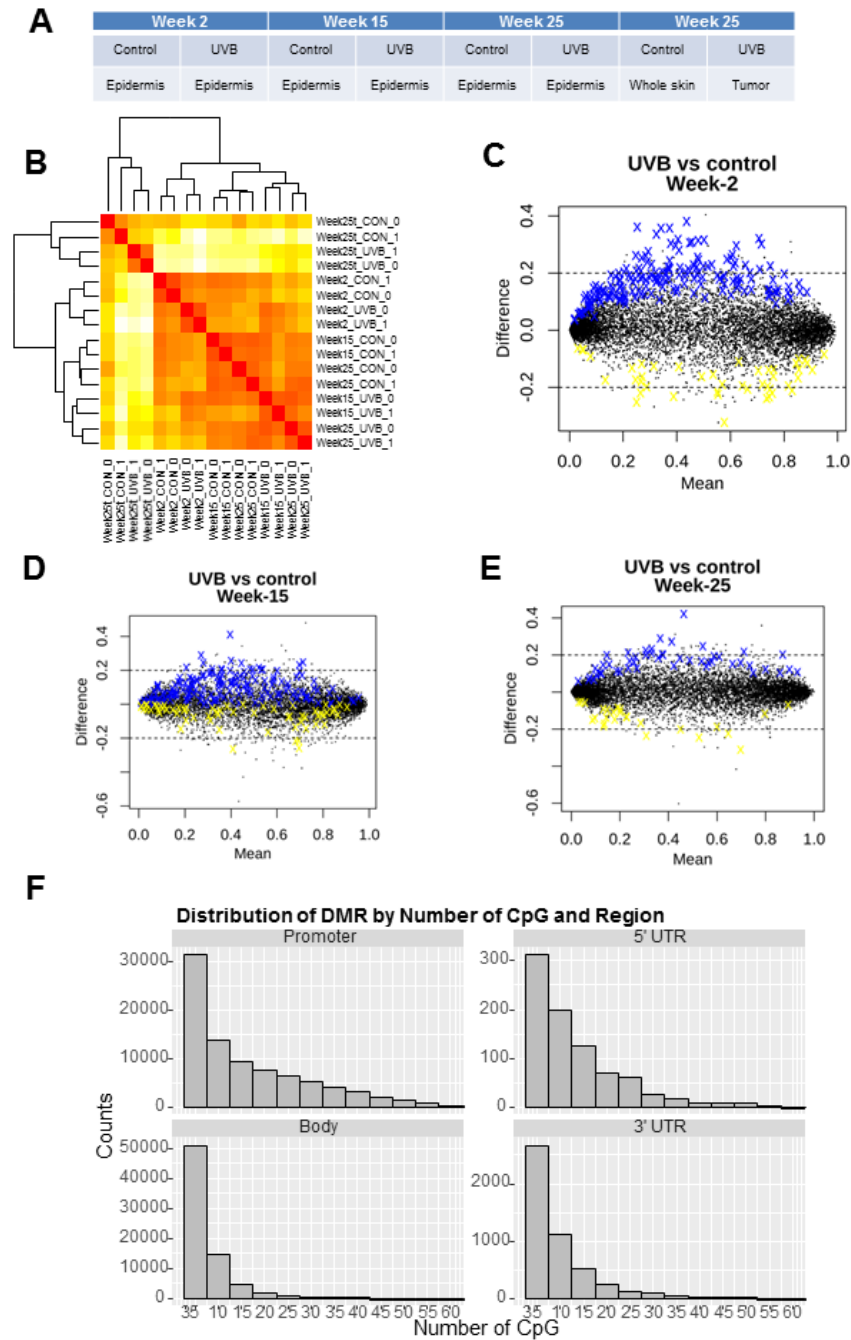

**Figure S1:** Methylation analysis on Methyl-seq data. (A) Sample collection scheme for the animal study. (B) Dendrogram clustering by Euclidean distance of 16 samples including epidermis, whole skin, and tumors. (C-E) MA plots showing methylation changes between UVB and Control conditions at different time points. (F) (E) Distribution of DMRs by CpG numbers and locations.

**Figure S2**

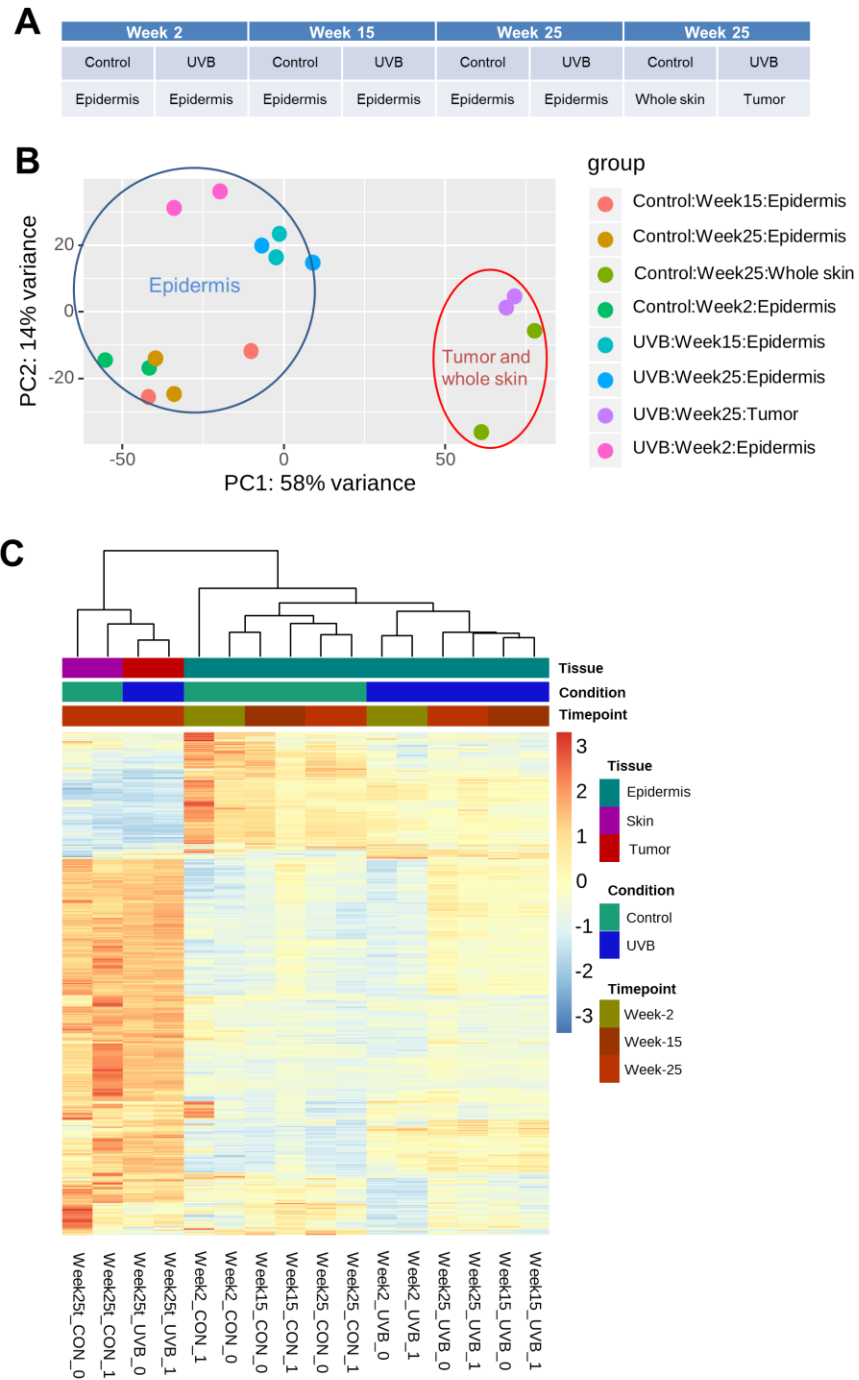

**Figure S2:** Gene expression analysis on RNA-seq data. (A) Sample collection scheme for the animal study (same as Figure S1A). (B) Principal component analysis (PCA) on RNA expression of the 16 samples. (C) Heatmap showing top 1000 regulated genes across all samples.

Figure S3

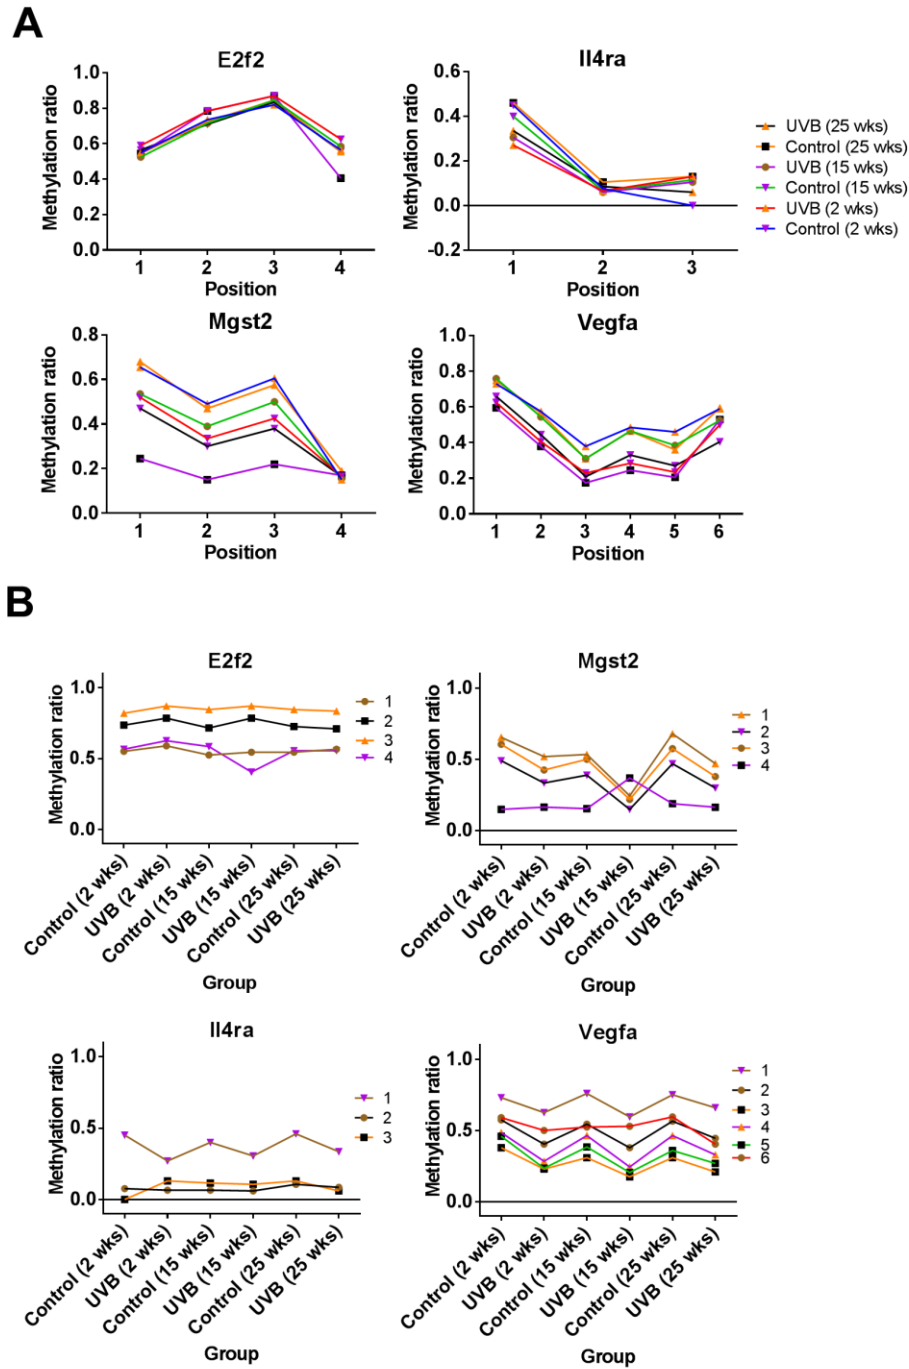

**Figure S3.** Single CpG methylation profiles of the 4 genes that were validated by pyrosequencing. (A) Data with CpG sites shown on x-axis. (B) Same data with groups shown on x-axis.
